# Supplementary material for: DNA-based prediction of external ear morphology in the Chinese population: an exploratory study
Source: PeerJ. 2025 Oct 9;13:e20169. doi: 10.7717/peerj.20169 (PMC12515430; doi:10.7717/peerj.20169)
Supplement: Supplemental Information 2 [file peerj-13-20169-s002.xlsx]

## Sheet: Table S7
The association analysis results between SNPs and ear traits are presented in Table S8 through 20.
Alternative Name	SNP_ID	Major Allele	Minor Allele
L1	rs10198822	T	C
L2	rs6802174	C	G
L3	rs74030209	C	T
L4	rs17023457	T	C
L5	rs17034666	A	G
L6	rs3827760	G	A
L8	rs7812632	C	G
L9	rs1948400	C	T
L10	rs6699106	C	T
L12	rs263156	G	T
L13	rs3789101	G	C
L14	rs7771119	C	A
L15	rs62169501	C	T
L16	rs1619249	A	G
L17	rs1960918	C	T
LXX2	Heterozygote
LXX3	Homozygote of minor allele
To simplify the data analysis process, we use alternative names to refer to SNP markers. For example, "L1" indicates rs10198822. "L12" indicates the heterozygote genotype of rs10198822-TC. "L13" indicates CC.
MAF: minor allele frequency
p_mul: p values from multinomial logistic regression
Std. Error: standard error
OR: odds ratio
CI: confidence interval

## Sheet: Table S8
Ear Protrusion
p_mul
	(Intercept)	L12	L13	L22	L23	L32	L33	L42	L43	L52	L53	L62	L63	L82	L83	L92	L93	L102	L103	L122	L123	L132	L133	L142	L143	L152	L153	L162	L163	L172	L173
level_1	0.325232	0.448497	0.962068	0.028267	0.494858	0.484256	0.141615	0.545964	0.350636	0.867583	0.290768	0.498986	0.864067	0.190084	0.22498	0.0357759	0.269619	0.941914	0.78638	0.169874	0.260694	0.219371	0.824968	0.00210231	0.331178	0.560136	0.791366	0.118969	0.157308	0.0834844	0.556032
level_2	0.0175393	0.0986844	0.819099	3.03495e-05	0.0468435	0.00520551	0.79613	0.0564843	0.797353	0.567449	0.270024	0.352558	0.35624	0.717215	0.56561	0.13404	0.0333962	0.352231	0.158149	0.690428	0.963211	0.0947663	0.614453	0.84958	0.875402	0.833149	0.286733	0.482979	0.620638	0.31991	0.770679
Std.Error
	(Intercept)	L12	L13	L22	L23	L32	L33	L42	L43	L52	L53	L62	L63	L82	L83	L92	L93	L102	L103	L122	L123	L132	L133	L142	L143	L152	L153	L162	L163	L172	L173
level_1	0.439126	0.249293	0.381311	0.218901	0.350965	0.197733	0.299247	0.230327	0.319326	0.300321	1.41317	0.316578	1.3389	0.226912	0.519495	0.261306	0.37956	0.194696	0.344212	0.258937	0.421552	0.192196	0.443043	0.2559	0.642995	0.22192	0.486193	0.272616	0.309242	0.192111	0.442849
level_2	0.518814	0.285536	0.427136	0.270526	0.43225	0.233518	0.419169	0.281232	0.412627	0.32496	1.4327	0.362285	1.22428	0.260264	0.835656	0.309393	0.482183	0.226954	0.427382	0.304936	0.497677	0.223809	0.570925	0.308116	0.746468	0.269721	0.519596	0.302123	0.345187	0.225809	0.548303
z_value
	(Intercept)	L12	L13	L22	L23	L32	L33	L42	L43	L52	L53	L62	L63	L82	L83	L92	L93	L102	L103	L122	L123	L132	L133	L142	L143	L152	L153	L162	L163	L172	L173
level_1	-0.983762	0.757923	-0.0475582	2.19356	0.682602	0.699473	1.4698	0.603819	-0.933357	-0.166729	1.05644	0.676085	-0.171199	-1.31033	1.21339	-2.09947	-1.10394	-0.0728647	-0.271014	1.37261	1.12475	1.2282	0.22116	-3.07538	-0.971744	-0.58264	0.264538	1.55911	1.41418	-1.73082	-0.588746
level_2	-2.3752	-1.65127	-0.228704	4.17083	1.98771	2.79403	-0.258358	1.90728	-0.256774	0.571813	1.10301	0.92964	0.922554	-0.362183	-0.574528	-1.49836	-2.12729	-0.930271	-1.41132	-0.398274	-0.0461247	1.67077	-0.503727	0.189654	-0.156801	-0.210664	1.06532	-0.70152	-0.494947	-0.994644	-0.291487
OR
	(Intercept)	L12	L13	L22	L23	L32	L33	L42	L43	L52	L53	L62	L63	L82	L83	L92	L93	L102	L103	L122	L123	L132	L133	L142	L143	L152	L153	L162	L163	L172	L173
level_1	0.649212	1.20797	0.982029	1.61635	1.2707	1.14833	1.55245	1.14921	0.742268	0.951161	4.4501	1.23866	0.795155	0.742799	1.87827	0.577756	0.657696	0.985914	0.910933	1.42678	1.60663	1.26625	1.10295	0.455213	0.535354	0.878711	1.13725	1.52965	1.54856	0.717122	0.770493
level_2	0.291625	0.624068	0.906932	3.09045	2.36124	1.92025	0.897362	1.70982	0.899468	1.2042	4.85633	1.40045	3.094	0.910043	0.618717	0.629027	0.358531	0.80967	0.547072	0.885637	0.977306	1.45344	0.750069	1.06018	0.889543	0.944764	1.73939	0.809009	0.842949	0.798836	0.852295
CI
	2.5 %.level_1	97.5 %.level_1	2.5 %.level_2	97.5 %.level_2
(Intercept)	-1.29267	0.428676	-2.24914	-0.215431
L12	-0.299661	0.677551	-1.03114	0.0881445
L13	-0.76549	0.729222	-0.93486	0.739484
L22	0.0511345	0.909211	0.598095	1.65854
L23	-0.448309	0.927448	0.0119941	1.70638
L32	-0.249241	0.525859	0.19477	1.11014
L33	-0.146679	1.02635	-0.929852	0.71326
L42	-0.312356	0.590507	-0.0148164	1.08759
L43	-0.923913	0.327823	-0.914685	0.702782
L52	-0.638691	0.538546	-0.451093	0.822726
L53	-1.27684	4.26269	-1.22776	4.38833
L62	-0.406448	0.834515	-0.37327	1.04686
L63	-2.85341	2.39497	-1.27008	3.52902
L82	-0.742068	0.147409	-0.604371	0.415845
L83	-0.38784	1.64854	-2.11796	1.15775
L92	-1.06076	-0.0364527	-1.06998	0.142817
L93	-1.16294	0.324912	-1.9708	-0.0806805
L102	-0.395783	0.36741	-0.655949	0.233692
L103	-0.76793	0.581357	-1.44083	0.234479
L122	-0.152089	0.862928	-0.719111	0.476215
L123	-0.352085	1.30037	-0.998384	0.952474
L132	-0.140642	0.612753	-0.0647234	0.812593
L133	-0.770366	0.966332	-1.40658	0.831402
L142	-1.28855	-0.285436	-0.545462	0.662333
L143	-1.88507	0.63542	-1.5801	1.346
L152	-0.564254	0.305656	-0.585464	0.471823
L153	-0.824304	1.08154	-0.464855	1.57192
L162	-0.109278	0.959359	-0.804097	0.380206
L163	-0.168778	1.04343	-0.847403	0.505705
L172	-0.709041	0.0440217	-0.667178	0.217978
L173	-1.12869	0.607242	-1.23448	0.91483

## Sheet: Table S9
Lobe Attachment
p_mul
	(Intercept)	L12	L13	L22	L23	L32	L33	L42	L43	L52	L53	L62	L63	L82	L83	L92	L93	L102	L103	L122	L123	L132	L133	L142	L143	L152	L153	L162	L163	L172	L173
level_1	0.910532	0.360812	0.552648	0.347787	0.0122664	0.892007	0.178891	0.623987	0.552299	0.185765	0.447572	0.408284	0.810468	0.111913	0.148196	0.278862	0.367605	0.310386	0.308354	0.690682	0.0684962	0.551445	0.210555	0.170558	0.727974	0.473508	0.207035	0.382727	0.722879	0.899437	0.498134
level_2	0.00563952	0.133836	0.252857	0.367709	0.117197	0.246992	0.0201737	0.916615	0.181231	0.499172	0.921382	0.967657	0.574134	0.269296	0.73935	0.044565	0.974167	0.87437	0.239635	0.62014	0.875957	0.133213	0.534154	0.231508	0.248534	0.190861	0.313593	0.0947416	0.903185	0.979221	0.357318
Std.Error
	(Intercept)	L12	L13	L22	L23	L32	L33	L42	L43	L52	L53	L62	L63	L82	L83	L92	L93	L102	L103	L122	L123	L132	L133	L142	L143	L152	L153	L162	L163	L172	L173
level_1	0.441323	0.252942	0.381444	0.222654	0.397319	0.20429	0.300523	0.240923	0.323376	0.297032	1.50398	0.319734	1.36379	0.232336	0.608518	0.258323	0.392901	0.201051	0.341809	0.264002	0.445621	0.197595	0.442815	0.26101	0.709029	0.233096	0.473395	0.263891	0.298295	0.196649	0.496672
level_2	0.567813	0.3089	0.468157	0.258521	0.472857	0.24293	0.446842	0.290799	0.452564	0.349271	1.83581	0.429517	1.40523	0.287713	0.909952	0.324329	0.533348	0.239149	0.454754	0.326672	0.575184	0.235411	0.585211	0.331445	0.818689	0.269723	0.55039	0.346135	0.402514	0.234962	0.597445
z_value
	(Intercept)	L12	L13	L22	L23	L32	L33	L42	L43	L52	L53	L62	L63	L82	L83	L92	L93	L102	L103	L122	L123	L132	L133	L142	L143	L152	L153	L162	L163	L172	L173
level_1	0.112367	-0.913819	-0.593796	0.93889	2.50439	0.135765	-1.34418	0.490208	-0.594319	-1.32321	0.75947	0.826917	-0.239823	1.58965	1.44593	1.08288	0.900969	-1.01441	-1.01868	0.39793	1.82173	0.595596	-1.25204	-1.37041	-0.347821	0.716782	-1.26176	0.872883	0.354614	-0.126373	0.677428
level_2	-2.76804	1.49915	1.14344	-0.900773	1.56665	1.15769	-2.3231	0.104699	-1.33698	-0.675793	-0.0986926	-0.0405465	0.561974	1.10469	-0.332714	2.00874	-0.0323821	-0.15811	-1.1759	-0.495652	-0.156096	1.50155	-0.621678	1.19648	1.15392	-1.30804	-1.00771	1.6709	0.121638	0.0260459	0.920488
OR
	(Intercept)	L12	L13	L22	L23	L32	L33	L42	L43	L52	L53	L62	L63	L82	L83	L92	L93	L102	L103	L122	L123	L132	L133	L142	L143	L152	L153	L162	L163	L172	L173
level_1	1.05084	0.793626	0.797319	1.2325	2.70483	1.02812	0.667673	1.12536	0.825151	0.675004	3.13375	1.30264	0.721035	1.44677	2.4106	1.32278	1.42474	0.815504	0.705961	1.11077	2.25196	1.12489	0.574404	0.699288	0.781441	1.18185	0.550289	1.25903	1.11158	0.975455	1.39998
level_2	0.207686	1.58897	1.70798	0.792257	2.09761	1.32477	0.354141	1.03091	0.546038	0.789753	0.834285	0.982735	2.20274	1.37415	0.738781	1.9184	0.982877	0.962894	0.585819	0.850513	0.914128	1.42402	0.695021	1.48672	2.57204	0.702712	0.574282	1.78311	1.05018	1.00614	1.73315
CI
	2.5 %.level_1	97.5 %.level_1	2.5 %.level_2	97.5 %.level_2
(Intercept)	-0.815388	0.914568	-2.68462	-0.458834
L12	-0.7269	0.264614	-0.142346	1.06852
L13	-0.974117	0.521117	-0.382262	1.45288
L22	-0.227346	0.645442	-0.739561	0.273823
L23	0.21631	1.77377	-0.185983	1.66758
L32	-0.372666	0.428137	-0.194897	0.757372
L33	-0.992971	0.185058	-1.91386	-0.162266
L42	-0.354098	0.590303	-0.53951	0.600402
L43	-0.825994	0.441617	-1.49208	0.281942
L52	-0.975208	0.189135	-0.920594	0.448524
L53	-1.80552	4.08998	-3.77929	3.41693
L62	-0.362274	0.89106	-0.859254	0.824423
L63	-3.00005	2.34591	-1.96449	3.54389
L82	-0.0860371	0.824704	-0.246075	0.881739
L83	-0.312797	2.07255	-2.08623	1.48072
L92	-0.226571	0.786038	0.0158186	1.28717
L93	-0.41608	1.12406	-1.06261	1.02807
L102	-0.598	0.190104	-0.506536	0.430912
L103	-1.01813	0.321738	-1.42605	0.356556
L122	-0.41238	0.622489	-0.80218	0.478349
L123	-0.0616007	1.6852	-1.21712	1.03756
L132	-0.269593	0.504967	-0.107916	0.81488
L133	-1.42232	0.313479	-1.5108	0.783179
L142	-0.869263	0.153879	-0.253052	1.04619
L143	-1.63629	1.14306	-0.659901	2.5493
L152	-0.289781	0.623939	-0.881455	0.17584
L153	-1.52515	0.330526	-1.63338	0.524111
L162	-0.28687	0.747562	-0.100055	1.25677
L163	-0.478868	0.690427	-0.739953	0.837875
L172	-0.410275	0.360573	-0.454396	0.466636
L173	-0.637	1.30992	-0.62103	1.72091

## Sheet: Table S10
Lobe Size
p_mul
	(Intercept)	L12	L13	L22	L23	L32	L33	L42	L43	L52	L53	L62	L63	L82	L83	L92	L93	L102	L103	L122	L123	L132	L133	L142	L143	L152	L153	L162	L163	L172	L173
level_1	0.000264666	0.570791	0.931672	0.250506	0.155697	0.0175536	0.222757	0.168282	0.735402	0.06372	0.839722	0.330112	0.179933	0.0416526	0.301278	0.35093	0.432976	0.924704	0.578758	0.191924	0.329392	0.911169	0.63644	0.603835	0.536171	0.523538	0.845051	0.2932	0.293713	0.789079	0.657907
level_2	0.271635	0.500298	0.814862	0.0723763	0.0878815	0.00194289	0.0689727	0.130513	0.824781	0.360596	0.856557	0.671148	0.399296	0.206046	0.811164	0.175359	0.332852	0.90606	0.823731	0.00735814	0.171117	0.502363	0.890141	0.528084	0.522096	0.4008	0.525537	0.351504	0.110866	0.761801	0.357129
Std.Error
	(Intercept)	L12	L13	L22	L23	L32	L33	L42	L43	L52	L53	L62	L63	L82	L83	L92	L93	L102	L103	L122	L123	L132	L133	L142	L143	L152	L153	L162	L163	L172	L173
level_1	0.675581	0.350604	0.543883	0.307968	0.549458	0.309858	0.455004	0.325992	0.427432	0.380638	1.55839	0.423372	1.3055	0.305471	1.09698	0.371077	0.563697	0.285975	0.492694	0.350114	0.627507	0.285927	0.583214	0.359234	1.31707	0.341373	0.652923	0.410007	0.454721	0.279449	0.714302
level_2	0.75558	0.397507	0.609042	0.351376	0.611378	0.34254	0.514657	0.371697	0.492105	0.429068	1.70491	0.479381	1.45383	0.347347	1.23176	0.418758	0.63676	0.322124	0.537902	0.407091	0.712969	0.319286	0.667394	0.405121	1.38429	0.379265	0.761556	0.453987	0.514778	0.315461	0.740833
z_value
	(Intercept)	L12	L13	L22	L23	L32	L33	L42	L43	L52	L53	L62	L63	L82	L83	L92	L93	L102	L103	L122	L123	L132	L133	L142	L143	L152	L153	L162	L163	L172	L173
level_1	3.64763	0.566887	0.0857413	1.14912	1.41969	-2.3749	-1.21923	1.37774	-0.337948	-1.85413	0.202249	-0.973889	-1.34096	-2.03697	1.0337	-0.932788	-0.78411	-0.0945096	-0.5552	1.30491	0.97534	0.111564	-0.472682	-0.518893	0.618614	0.637901	-0.195436	-1.05113	-1.05001	-0.267507	-0.442805
level_2	1.09931	0.674021	0.234158	1.79674	1.70668	-3.09883	-1.8186	1.51208	-0.2214	-0.914231	0.180759	-0.424573	-0.842879	-1.26451	0.238925	-1.35518	-0.968385	-0.11801	0.222748	2.68018	1.36862	0.670776	0.138126	-0.630934	0.640118	0.840193	-0.634833	-0.931677	-1.59431	-0.303116	0.92085
OR
	(Intercept)	L12	L13	L22	L23	L32	L33	L42	L43	L52	L53	L62	L63	L82	L83	L92	L93	L102	L103	L122	L123	L132	L133	L142	L143	L152	L153	L162	L163	L172	L173
level_1	11.7549	1.21988	1.04774	1.4246	2.18161	0.479083	0.574214	1.56695	0.865499	0.493736	1.37051	0.662114	0.173666	0.536743	3.1079	0.707416	0.642749	0.973335	0.760679	1.57912	1.84418	1.03241	0.75906	0.829938	2.25863	1.24329	0.880201	0.649879	0.620355	0.927971	0.728843
level_2	2.29473	1.30725	1.15328	1.88011	2.83893	0.345946	0.392212	1.75424	0.896773	0.675524	1.36094	0.815844	0.29364	0.644536	1.34218	0.566945	0.539761	0.9627	1.12729	2.97749	2.65325	1.23883	1.09657	0.774448	2.42567	1.37528	0.616646	0.655099	0.440116	0.908808	1.97822
CI
	2.5 %.level_1	97.5 %.level_1	2.5 %.level_2	97.5 %.level_2
(Intercept)	1.14016	3.78839	-0.650296	2.31152
L12	-0.488419	0.885925	-0.511171	1.04703
L13	-1.01936	1.11263	-1.05109	1.33631
L22	-0.249713	0.957497	-0.0573516	1.32002
L23	-0.296856	1.85698	-0.154852	2.2417
L32	-1.34319	-0.128572	-1.73284	-0.390105
L33	-1.44654	0.337037	-1.94466	0.0727547
L42	-0.189799	1.08807	-0.166477	1.29055
L43	-0.9822	0.693301	-1.07346	0.855556
L52	-1.45179	0.040283	-1.23322	0.448691
L53	-2.73921	3.36958	-3.03339	3.64975
L62	-1.24211	0.417476	-1.1431	0.736037
L63	-4.30935	0.808107	-4.07485	1.62405
L82	-1.22095	-0.0235245	-1.12001	0.241563
L83	-1.0161	3.284	-2.11991	2.70851
L92	-1.07343	0.381162	-1.38824	0.253257
L93	-1.54683	0.662826	-1.86466	0.631398
L102	-0.587527	0.533473	-0.669365	0.593338
L103	-1.23921	0.692119	-0.934452	1.17409
L122	-0.229344	1.14308	0.293195	1.88896
L123	-0.617859	1.84193	-0.421607	2.37318
L132	-0.528507	0.592306	-0.41162	0.839959
L133	-1.41875	0.867404	-1.21588	1.40025
L142	-0.89049	0.517682	-1.04963	0.538418
L143	-1.76666	3.39618	-1.82705	3.59926
L152	-0.451317	0.886841	-0.42469	1.062
L153	-1.40731	1.1521	-1.97608	1.00916
L162	-1.23457	0.372629	-1.31277	0.466829
L163	-1.3687	0.413775	-1.82966	0.188229
L172	-0.622465	0.472956	-0.713913	0.52267
L173	-1.7163	1.08371	-0.76981	2.1342

## Sheet: Table S11
Tragus Size
p_mul
	(Intercept)	L12	L13	L22	L23	L32	L33	L42	L43	L52	L53	L62	L63	L82	L83	L92	L93	L102	L103	L122	L123	L132	L133	L142	L143	L152	L153	L162	L163	L172	L173
level_1	1.40133e-06	0.294892	0.547536	0.0835077	0.253752	0.369661	0.553032	0.997012	0.921318	0.0599695	0.749047	0.111408	0.0523981	0.850854	0.721144	0.837181	0.492833	0.808643	0.676128	0.053707	0.0284483	0.0375221	0.0538561	0.405538	0.269671	0.195313	0.936446	0.239271	0.134371	0.0481895	0.0695918
level_2	0.00131132	0.0831067	0.744552	0.0398496	0.0409004	0.0595359	0.417264	0.73609	0.977279	0.344004	0.583013	0.214289	0.0124824	0.261095	0.743252	0.598783	0.684641	0.716395	0.350989	0.097077	0.0565424	0.0201102	0.148762	0.0807547	0.158841	0.306438	0.813234	0.670637	0.363262	0.320289	0.0293489
Std.Error
	(Intercept)	L12	L13	L22	L23	L32	L33	L42	L43	L52	L53	L62	L63	L82	L83	L92	L93	L102	L103	L122	L123	L132	L133	L142	L143	L152	L153	L162	L163	L172	L173
level_1	0.962345	0.504474	0.672234	0.46427	0.704681	0.385967	0.655843	0.448272	0.573205	0.549093	1.94771	0.844406	1.65118	0.406019	1.14542	0.509617	0.781746	0.37956	0.746939	0.495363	0.746718	0.390219	0.697002	0.443156	1.66464	0.477475	0.938191	0.557996	0.603657	0.38265	0.641196
level_2	0.982895	0.510887	0.686818	0.466036	0.727242	0.392143	0.662661	0.457929	0.600337	0.540358	1.99783	0.85481	1.66101	0.418632	1.21551	0.522847	0.812878	0.385261	0.749581	0.510532	0.758845	0.395043	0.706712	0.456566	1.67309	0.480179	0.954184	0.574828	0.622569	0.386015	0.71705
z_value
	(Intercept)	L12	L13	L22	L23	L32	L33	L42	L43	L52	L53	L62	L63	L82	L83	L92	L93	L102	L103	L122	L123	L132	L133	L142	L143	L152	L153	L162	L163	L172	L173
level_1	4.82482	1.04745	-0.601456	-1.73069	-1.14129	0.897109	0.593223	0.00374525	0.0987741	-1.88102	0.319897	1.5919	-1.93985	-0.188029	0.356931	-0.205501	0.68581	0.242176	0.417753	-1.92919	-2.19105	-2.08004	-1.92799	0.831772	1.10382	-1.29502	-0.0797372	-1.17681	-1.49709	-1.97569	-1.81456
level_2	3.21349	1.73294	-0.325831	-2.05531	-2.04454	1.88421	0.811177	0.337036	-0.0284808	-0.946284	0.548989	1.24186	-2.49821	-1.12381	-0.32755	0.526151	0.406139	-0.36328	0.932673	-1.65919	-1.90683	-2.32429	-1.44392	1.74632	1.40898	-1.02273	0.236256	-0.425273	-0.909168	-0.993865	-2.17877
OR
	(Intercept)	L12	L13	L22	L23	L32	L33	L42	L43	L52	L53	L62	L63	L82	L83	L92	L93	L102	L103	L122	L123	L132	L133	L142	L143	L152	L153	L162	L163	L172	L173
level_1	103.87	1.69623	0.667431	0.447757	0.447427	1.41376	1.47559	1.00168	1.05825	0.35599	1.86464	3.83515	0.0406387	0.926498	1.50507	0.900571	1.70938	1.09628	1.3662	0.384562	0.194739	0.444116	0.260849	1.44572	6.28063	0.538838	0.927921	0.518583	0.405057	0.469541	0.312395
level_2	23.5358	2.4238	0.799486	0.383719	0.226078	2.09359	1.71178	1.16689	0.983047	0.599696	2.99453	2.89086	0.0157715	0.624714	0.671569	1.31666	1.39116	0.869395	2.01197	0.428669	0.235278	0.39924	0.360438	2.21957	10.5629	0.611958	1.25286	0.783128	0.567781	0.681372	0.209656
CI
	2.5 %.level_1	97.5 %.level_1	2.5 %.level_2	97.5 %.level_2
(Intercept)	2.75698	6.5293	1.23209	5.08496
L12	-0.46034	1.51716	-0.115985	1.88665
L13	-1.72187	0.913236	-1.56993	1.12235
L22	-1.71346	0.106447	-1.87126	-0.0444322
L23	-2.18539	0.576908	-2.91224	-0.0615063
L32	-0.410226	1.10273	-0.0297045	1.50747
L33	-0.896367	1.67449	-0.761257	1.83633
L42	-0.876919	0.880276	-0.743185	1.05186
L43	-1.06684	1.18008	-1.19374	1.15954
L52	-2.10906	0.0433487	-1.57042	0.547751
L53	-3.19438	4.44051	-2.81889	5.01247
L62	-0.310798	2.99921	-0.613844	2.73695
L63	-6.43928	0.0332146	-7.40508	-0.894025
L82	-0.872125	0.719438	-1.29096	0.350042
L83	-1.83615	2.65382	-2.78049	1.98421
L92	-1.10356	0.894104	-0.749665	1.29986
L93	-0.996064	2.06832	-1.26307	1.92335
L102	-0.652004	0.835845	-0.895056	0.61514
L103	-1.15194	1.77601	-0.770038	2.16826
L122	-1.92654	0.0152433	-1.8477	0.153554
L123	-3.09963	-0.172554	-2.9343	0.0403193
L132	-1.57648	-0.0468547	-1.69246	-0.143923
L133	-2.70991	0.0222846	-2.40557	0.364695
L142	-0.499966	1.23718	-0.0975409	1.69217
L143	-1.42517	5.10011	-0.921844	5.63653
L152	-1.55417	0.317493	-1.43223	0.450043
L153	-1.91363	1.76401	-1.64473	2.0956
L162	-1.75031	0.436996	-1.3711	0.882183
L163	-2.08687	0.279419	-1.78623	0.654193
L172	-1.50598	-0.00601908	-1.14022	0.372928
L173	-2.42021	0.0932337	-2.96768	-0.156893

## Sheet: Table S12
Antitragus Size
p_mul
	(Intercept)	L12	L13	L22	L23	L32	L33	L42	L43	L52	L53	L62	L63	L82	L83	L92	L93	L102	L103	L122	L123	L132	L133	L142	L143	L152	L153	L162	L163	L172	L173
level_1	0.919412	0.575712	0.668926	0.757598	0.181467	0.300569	0.425853	0.0568832	0.0155276	0.715782	0.0632206	0.0477612	0.246067	0.67992	0.605244	0.309798	0.409269	0.528818	0.0750895	0.375753	0.963573	0.139097	0.411092	0.359678	0.563	0.0731722	0.178404	0.123767	0.0544835	0.148147	0.700327
level_2	0.0563425	0.13728	0.471862	0.205573	0.274486	0.772723	0.607385	0.208187	0.2078	0.137435	0.345699	0.0755749	0.911815	0.780094	0.116168	0.26006	0.94853	0.830643	0.990709	0.895248	0.348203	0.574924	0.0574594	0.0809835	0.695858	0.95652	0.742534	0.885506	0.99897	0.269865	0.394818
Std.Error
	(Intercept)	L12	L13	L22	L23	L32	L33	L42	L43	L52	L53	L62	L63	L82	L83	L92	L93	L102	L103	L122	L123	L132	L133	L142	L143	L152	L153	L162	L163	L172	L173
level_1	0.453325	0.254478	0.392421	0.228608	0.372131	0.207002	0.31961	0.24308	0.336691	0.323308	1.5957	0.332416	1.58008	0.235206	0.524886	0.271663	0.409166	0.204129	0.360797	0.269114	0.428893	0.20085	0.441157	0.266103	0.653311	0.237144	0.517609	0.27315	0.316587	0.202436	0.443678
level_2	0.489344	0.274409	0.414965	0.236293	0.393455	0.2138	0.368027	0.252907	0.371105	0.308297	1.58118	0.344706	1.21505	0.243574	0.81452	0.287056	0.421295	0.209116	0.403784	0.280339	0.482679	0.206405	0.597211	0.281405	0.752967	0.244976	0.488852	0.301873	0.338496	0.20804	0.542573
z_value
	(Intercept)	L12	L13	L22	L23	L32	L33	L42	L43	L52	L53	L62	L63	L82	L83	L92	L93	L102	L103	L122	L123	L132	L133	L142	L143	L152	L153	L162	L163	L172	L173
level_1	-0.101175	0.559659	0.427623	0.308636	1.33625	-1.03521	0.796309	1.90421	2.41983	-0.364102	1.85764	-1.97949	-1.15995	-0.412573	0.516874	-1.01565	-0.825181	0.629811	1.77992	0.885748	0.0456706	-1.47916	-0.821973	0.915979	0.578391	-1.79176	-1.34568	-1.53915	-1.92297	1.44611	0.384879
level_2	-1.90838	1.486	0.719452	1.26583	1.09279	-0.288815	-0.51381	1.25857	1.25964	1.48541	0.942965	-1.77696	-0.11075	-0.279196	-1.57106	-1.12625	0.0645524	0.213876	0.0116454	0.131666	-0.938081	-0.560815	-1.8998	1.74501	0.390918	-0.0545216	0.3285	-0.143993	-0.00129124	1.10337	-0.850913
OR
	(Intercept)	L12	L13	L22	L23	L32	L33	L42	L43	L52	L53	L62	L63	L82	L83	L92	L93	L102	L103	L122	L123	L132	L133	L142	L143	L152	L153	L162	L163	L172	L173
level_1	0.955171	1.15306	1.18271	1.07311	1.64421	0.807113	1.28983	1.58863	2.25858	0.888948	19.3799	0.517879	0.159961	0.90752	1.31167	0.758879	0.713455	1.13719	1.90064	1.26918	1.01978	0.742978	0.695852	1.27602	1.45917	0.653833	0.498307	0.656772	0.54401	1.3401	1.18621
level_2	0.393037	1.50346	1.3479	1.34865	1.5372	0.940119	0.827707	1.37479	1.59593	1.58083	4.44154	0.541978	0.874095	0.934256	0.278131	0.723759	1.02757	1.04574	1.00471	1.0376	0.63585	0.890694	0.321557	1.63404	1.34225	0.986732	1.1742	0.957464	0.999563	1.25803	0.630223
CI
	2.5 %.level_1	97.5 %.level_1	2.5 %.level_2	97.5 %.level_2
(Intercept)	-0.934365	0.842635	-1.89295	0.0252439
L12	-0.356346	0.641188	-0.130061	0.945604
L13	-0.601322	0.936939	-0.514769	1.11186
L22	-0.377507	0.518621	-0.164018	0.762234
L23	-0.232102	1.22662	-0.341193	1.20112
L32	-0.620007	0.191425	-0.480789	0.357291
L33	-0.371916	0.880932	-0.910416	0.532224
L42	-0.0135534	0.939302	-0.177388	0.813989
L43	0.154834	1.47464	-0.259895	1.19481
L52	-0.75139	0.515956	-0.146303	1.0622
L53	-0.163284	6.09176	-1.60806	4.59006
L62	-1.30954	-0.00648976	-1.28814	0.0630828
L63	-4.92973	1.26408	-2.51602	2.24689
L82	-0.558035	0.363956	-0.5454	0.409391
L83	-0.757457	1.30006	-2.87609	0.316768
L92	-0.808363	0.256536	-0.885916	0.239322
L93	-1.13959	0.464314	-0.798527	0.852919
L102	-0.271522	0.528647	-0.365136	0.454586
L103	-0.0649603	1.34934	-0.786699	0.796104
L122	-0.289087	0.765822	-0.512544	0.586366
L123	-0.821028	0.860204	-1.39883	0.493242
L132	-0.690747	0.0965688	-0.520301	0.288791
L133	-1.22727	0.502033	-2.30509	0.0359305
L142	-0.277808	0.765298	-0.0604897	1.0426
L143	-0.902597	1.65834	-1.18144	1.77014
L152	-0.889696	0.0398896	-0.493501	0.466788
L153	-1.71103	0.317956	-0.797544	1.11872
L162	-0.955783	0.114945	-0.635128	0.548193
L163	-1.22929	0.0117111	-0.663878	0.663004
L172	-0.104023	0.68951	-0.178205	0.637297
L173	-0.698831	1.04036	-1.5251	0.601741

## Sheet: Table S13
Inter-tragic Incisure
p_mul
	(Intercept)	L12	L13	L22	L23	L32	L33	L42	L43	L52	L53	L62	L63	L82	L83	L92	L93	L102	L103	L122	L123	L132	L133	L142	L143	L152	L153	L162	L163	L172	L173
level_1	0.00455601	0.00107542	0.183107	0.438054	0.0906406	0.234739	0.960855	0.349259	0.183837	0.216684	0.987173	0.780011	0.841106	0.519315	0.0626548	0.407715	0.0503551	0.231221	0.630311	0.786873	0.798788	0.450098	0.676197	0.150966	0.827908	0.0408973	0.85085	0.514298	0.435884	0.0153163	0.824704
level_2	0.499692	0.172313	0.604147	0.801077	0.832867	0.327376	0.680798	0.0460422	0.85965	0.118794	0.525459	0.0850566	0.392982	0.434489	0.303724	0.221632	0.013613	0.788995	0.16286	0.692333	0.332274	0.701918	0.917342	0.0523838	0.658907	0.157304	0.368303	0.764639	0.895442	0.00724654	0.197958
Std.Error
	(Intercept)	L12	L13	L22	L23	L32	L33	L42	L43	L52	L53	L62	L63	L82	L83	L92	L93	L102	L103	L122	L123	L132	L133	L142	L143	L152	L153	L162	L163	L172	L173
level_1	0.462654	0.254454	0.396876	0.217823	0.366612	0.19907	0.311615	0.237706	0.348625	0.320366	1.22616	0.347088	1.25516	0.22731	0.800726	0.276168	0.394372	0.195912	0.352513	0.267445	0.439121	0.1925	0.48852	0.267592	0.685004	0.222248	0.464331	0.27799	0.315879	0.190987	0.463506
level_2	0.650948	0.380288	0.55004	0.318103	0.550077	0.29798	0.459871	0.329079	0.473479	0.422834	1.6541	0.442378	1.46961	0.335691	0.986847	0.370969	0.607726	0.286779	0.618519	0.383233	0.594472	0.290137	0.667705	0.371804	0.974475	0.335271	0.687125	0.397269	0.45545	0.290141	0.754841
z_value
	(Intercept)	L12	L13	L22	L23	L32	L33	L42	L43	L52	L53	L62	L63	L82	L83	L92	L93	L102	L103	L122	L123	L132	L133	L142	L143	L152	L153	L162	L163	L172	L173
level_1	2.83686	-3.27001	-1.33125	0.775483	1.69203	1.18824	0.0490806	0.936027	1.32903	1.23539	-0.0160775	0.279304	-0.20048	-0.644401	1.86163	-0.827921	-1.95694	1.19722	0.481289	-0.270374	-0.254916	0.755252	0.417659	-1.43613	0.217385	2.04457	-0.188035	-0.65216	-0.779162	-2.42481	-0.221499
level_2	0.674974	-1.36481	0.518446	-0.251954	0.211026	0.979413	0.411375	-1.99501	-0.176819	1.55985	-0.634953	1.72207	0.854222	-0.781533	1.02848	-1.2222	-2.46732	0.267616	-1.39552	0.395691	0.969544	0.382732	0.103782	-1.93997	-0.441423	1.4142	-0.899656	0.299395	0.131421	-2.6853	-1.28739
OR
	(Intercept)	L12	L13	L22	L23	L32	L33	L42	L43	L52	L53	L62	L63	L82	L83	L92	L93	L102	L103	L122	L123	L132	L133	L142	L143	L152	L153	L162	L163	L172	L173
level_1	3.71538	0.435148	0.589582	1.18402	1.85952	1.26686	1.01541	1.24919	1.58937	1.48554	0.980479	1.1018	0.777529	0.863744	4.44002	0.795611	0.462199	1.26434	1.1849	0.930242	0.894099	1.15649	1.22634	0.68093	1.16057	1.57523	0.916393	0.83419	0.781828	0.629326	0.902428
level_2	1.55173	0.595103	1.32998	0.92298	1.12309	1.3389	1.20826	0.518656	0.919689	1.93394	0.349842	2.14214	3.50915	0.769239	2.75923	0.635465	0.223253	1.07977	0.42183	1.16374	1.77956	1.11745	1.07175	0.486127	0.650408	1.60663	0.538926	1.1263	1.06168	0.458812	0.37841
CI
	2.5 %.level_1	97.5 %.level_1	2.5 %.level_2	97.5 %.level_2
(Intercept)	0.405698	2.21927	-0.836461	1.71521
L12	-1.33079	-0.333348	-1.26437	0.226331
L13	-1.3062	0.249521	-0.792893	1.36322
L22	-0.258007	0.595843	-0.703618	0.543323
L23	-0.0982284	1.33886	-0.96205	1.19421
L32	-0.153627	0.626714	-0.292185	0.875876
L33	-0.59546	0.626049	-0.712152	1.09051
L42	-0.243396	0.688393	-1.3015	-0.0115318
L43	-0.219958	1.14663	-1.01172	0.844281
L52	-0.232128	1.02368	-0.16918	1.4883
L53	-2.42294	2.38351	-4.29225	2.1917
L62	-0.583336	0.777222	-0.105238	1.62885
L63	-2.7117	2.20843	-1.62501	4.13575
L82	-0.591997	0.29904	-0.920296	0.395589
L83	-0.0787361	3.06005	-0.919233	2.94914
L92	-0.769925	0.312634	-1.18049	0.273688
L93	-1.54471	0.00119448	-2.69057	-0.308331
L102	-0.149431	0.61853	-0.485329	0.638823
L103	-0.521253	0.860574	-2.07543	0.349122
L122	-0.596493	0.451873	-0.599481	0.902765
L123	-0.9726	0.748722	-0.588777	1.74151
L132	-0.231907	0.522679	-0.457613	0.679702
L133	-0.753447	1.16152	-1.23938	1.37797
L142	-0.908766	0.140174	-1.45001	0.00743526
L143	-1.19367	1.49149	-2.34009	1.47978
L152	0.0188035	0.89	-0.182979	1.13126
L153	-0.997382	0.822761	-1.96492	0.728564
L162	-0.726145	0.363557	-0.659693	0.897574
L163	-0.865232	0.37299	-0.83281	0.952522
L172	-0.837433	-0.0887796	-1.34778	-0.210449
L173	-1.01112	0.805788	-2.45124	0.507685

## Sheet: Table S14
Superior Helix Rolling
p_mul
	(Intercept)	L12	L13	L22	L23	L32	L33	L42	L43	L52	L53	L62	L63	L82	L83	L92	L93	L102	L103	L122	L123	L132	L133	L142	L143	L152	L153	L162	L163	L172	L173
level_1	0.0257832	0.0443027	0.824625	0.934171	0.811996	0.512175	0.515403	0.568335	0.117435	0.375989	0.301954	0.178231	0.570063	0.475694	0.493833	0.5543	0.504879	0.829128	0.167541	0.0824425	0.730143	0.823494	0.494752	0.195385	0.984769	0.24244	0.718847	0.573084	0.844402	0.120571	0.772575
level_2	0.0238638	0.00565116	0.407978	0.810813	0.470138	0.205962	0.139724	0.267846	0.356245	0.23246	0.378752	0.11697	0.923448	0.58361	0.589892	0.735141	0.354487	0.490471	0.131525	0.0619977	0.901717	0.62308	0.509554	0.0798331	0.588282	0.102977	0.336427	0.327254	0.903969	0.103636	0.595146
Std.Error
	(Intercept)	L12	L13	L22	L23	L32	L33	L42	L43	L52	L53	L62	L63	L82	L83	L92	L93	L102	L103	L122	L123	L132	L133	L142	L143	L152	L153	L162	L163	L172	L173
level_1	0.96795	0.634539	0.753402	0.507002	0.808439	0.468154	0.644016	0.520748	0.596441	0.677989	1.96986	0.810099	1.90162	0.479123	1.22712	0.585759	0.809046	0.457121	0.655047	0.521961	0.903428	0.437923	1.12996	0.549335	1.55568	0.60264	0.990702	0.552593	0.693513	0.436493	0.940366
level_2	0.961198	0.630184	0.744282	0.503489	0.802251	0.463581	0.643402	0.51917	0.587286	0.674945	1.7131	0.803535	1.64615	0.476722	1.20327	0.581803	0.807664	0.453995	0.639163	0.517277	0.900223	0.434397	1.12798	0.545338	1.52704	0.597521	0.986892	0.547755	0.685951	0.433029	0.930099
z_value
	(Intercept)	L12	L13	L22	L23	L32	L33	L42	L43	L52	L53	L62	L63	L82	L83	L92	L93	L102	L103	L122	L123	L132	L133	L142	L143	L152	L153	L162	L163	L172	L173
level_1	2.22946	2.01122	0.221601	-0.0825987	0.237852	-0.655454	-0.650448	0.570505	-1.56563	-0.88531	-1.03225	1.34622	-0.567959	0.713245	-0.684225	-0.591329	-0.666833	0.21582	-1.38015	1.73669	0.344935	-0.223053	0.682771	1.29481	0.0190909	-1.16891	-0.359999	-0.563515	0.196266	-1.55238	-0.289008
level_2	2.25932	2.76736	0.827457	0.239377	0.722254	-1.26475	-1.47682	1.10804	-0.922543	-1.19405	-0.880199	1.56762	0.0960912	0.548119	-0.538992	-0.338295	-0.925921	-0.68956	-1.50812	1.86631	0.123493	0.49149	0.659533	1.75165	0.541327	-1.63059	-0.961248	-0.97966	0.120649	-1.62748	-0.531393
OR
	(Intercept)	L12	L13	L22	L23	L32	L33	L42	L43	L52	L53	L62	L63	L82	L83	L92	L93	L102	L103	L122	L123	L132	L133	L142	L143	L152	L153	L162	L163	L172	L173
level_1	8.65388	3.58298	1.1817	0.958987	1.21202	0.735759	0.65777	1.34594	0.393055	0.548685	0.130891	2.97598	0.339581	1.40738	0.431872	0.707246	0.583041	1.10369	0.404922	2.4756	1.36564	0.906939	2.16302	2.03661	1.03015	0.49439	0.700016	0.732425	1.14581	0.507832	0.762027
level_2	8.77275	5.71988	1.85125	1.12809	1.78502	0.556375	0.386668	1.77759	0.581702	0.446679	0.221382	3.52415	1.17138	1.29862	0.522801	0.821338	0.473391	0.731208	0.38139	2.62584	1.11759	1.23801	2.10421	2.5993	2.2856	0.377453	0.387264	0.584725	1.08628	0.494235	0.610029
CI
	2.5 %.level_1	97.5 %.level_1	2.5 %.level_2	97.5 %.level_2
(Intercept)	0.260861	4.05515	0.287736	4.05556
L12	0.0325211	2.51987	0.50881	2.97908
L13	-1.30969	1.64359	-0.842905	2.07463
L22	-1.03558	0.951829	-0.866296	1.10734
L23	-1.39222	1.7768	-0.992954	2.15181
L32	-1.22442	0.610711	-1.49491	0.32229
L33	-1.68115	0.84335	-2.21123	0.310856
L42	-0.723558	1.31774	-0.442294	1.59281
L43	-2.10281	0.235198	-1.69285	0.609262
L52	-1.92907	0.728604	-2.12878	0.516952
L53	-5.89424	1.82746	-4.86547	1.84974
L62	-0.497192	2.67834	-0.315262	2.83454
L63	-4.80715	2.64707	-3.06821	3.38457
L82	-0.597331	1.28079	-0.673058	1.19566
L83	-3.24474	1.56549	-3.00692	1.70982
L92	-1.49444	0.80169	-1.33713	0.943492
L93	-2.1252	1.0462	-2.33083	0.835159
L102	-0.797285	0.994597	-1.20287	0.576758
L103	-2.18793	0.379808	-2.21667	0.288804
L122	-0.116542	1.92951	-0.0484439	1.97925
L123	-1.45906	2.08231	-1.65323	1.87558
L132	-0.955993	0.760633	-0.6379	1.0649
L133	-1.44318	2.98619	-1.46686	2.95474
L142	-0.365391	1.78796	-0.113599	2.02409
L143	-3.01938	3.07878	-2.16632	3.81957
L152	-1.88558	0.476721	-2.14543	0.196809
L153	-2.29839	1.58509	-2.88292	0.985625
L162	-1.39446	0.771668	-1.61019	0.536966
L163	-1.22315	1.49537	-1.26168	1.4272
L172	-1.53312	0.177906	-1.55346	0.143977
L173	-2.11486	1.57131	-2.31721	1.32871

## Sheet: Table S15
Posterior Helix Rolling
p_mul
	(Intercept)	L12	L13	L22	L23	L32	L33	L42	L43	L52	L53	L62	L63	L82	L83	L92	L93	L102	L103	L122	L123	L132	L133	L142	L143	L152	L153	L162	L163	L172	L173
level_1	0.0322489	0.654282	0.768215	0.39943	0.814238	0.715699	0.28925	0.331345	0.352587	0.175357	0.0574604	0.110601	0.195915	0.45428	0.157772	0.5088	0.5646	0.903805	0.0253138	0.658682	0.746031	0.723085	0.926514	0.00831329	0.0149452	0.36631	0.670352	0.317374	0.0533587	0.387136	0.136079
level_2	0.332343	0.24124	0.465865	0.349475	0.406719	0.988567	0.357238	0.706586	0.36053	0.167158	0.173518	0.055121	0.175872	0.944546	0.567369	0.651012	0.964251	0.518621	0.0560181	0.74256	0.810128	0.582732	0.565717	0.0442981	0.0356499	0.484903	0.0129635	0.396394	0.00911777	0.364838	0.240192
Std.Error
	(Intercept)	L12	L13	L22	L23	L32	L33	L42	L43	L52	L53	L62	L63	L82	L83	L92	L93	L102	L103	L122	L123	L132	L133	L142	L143	L152	L153	L162	L163	L172	L173
level_1	0.512014	0.286739	0.443563	0.247612	0.421726	0.225326	0.379031	0.277659	0.386912	0.381332	1.40666	0.446101	1.64339	0.262259	0.714302	0.299426	0.46056	0.22732	0.381085	0.313458	0.495827	0.218636	0.556674	0.3159	0.689502	0.256657	0.506934	0.301453	0.366426	0.220518	0.509434
level_2	0.568379	0.315809	0.473742	0.278302	0.45713	0.251097	0.4161	0.306448	0.426254	0.41345	1.33062	0.471722	1.6465	0.289346	0.649592	0.330916	0.510397	0.252837	0.420579	0.340654	0.540261	0.243657	0.628701	0.345249	0.813487	0.285934	0.648672	0.338974	0.398641	0.246888	0.550389
z_value
	(Intercept)	L12	L13	L22	L23	L32	L33	L42	L43	L52	L53	L62	L63	L82	L83	L92	L93	L102	L103	L122	L123	L132	L133	L142	L143	L152	L153	L162	L163	L172	L173
level_1	2.14131	-0.447821	-0.294711	0.84264	0.234962	0.364214	1.05977	-0.971409	-0.929584	1.35519	-1.89979	1.5955	1.29328	-0.748298	-1.41261	0.660708	0.576023	-0.120857	-2.23658	0.441734	0.323877	0.354339	0.0922317	-2.63907	-2.4337	0.903407	-0.425664	0.999869	1.93201	-0.864824	-1.49055
level_2	0.969405	-1.17189	0.729224	0.935607	0.829682	0.0143299	0.92064	-0.376445	-0.914355	1.38139	-1.36099	1.91792	1.35357	-0.0695575	0.57193	0.452357	-0.0448192	-0.645473	-1.9109	-0.328466	0.240261	0.549399	-0.574371	-2.01126	-2.1009	0.698438	-2.48477	0.848078	2.60761	-0.906186	-1.17451
OR
	(Intercept)	L12	L13	L22	L23	L32	L33	L42	L43	L52	L53	L62	L63	L82	L83	L92	L93	L102	L103	L122	L123	L132	L133	L142	L143	L152	L153	L162	L163	L172	L173
level_1	2.99332	0.879495	0.877461	1.23201	1.10417	1.08553	1.49434	0.763593	0.697909	1.67662	0.0690895	2.03756	8.37588	0.821809	0.364573	1.21876	1.30381	0.972901	0.426422	1.14851	1.1742	1.08055	1.05268	0.434447	0.186739	1.26095	0.805909	1.35177	2.0298	0.826373	0.467976
level_2	1.73497	0.690669	1.41265	1.29743	1.46122	1.00361	1.46679	0.891045	0.677228	1.77028	0.163498	2.47125	9.2874	0.980075	1.44994	1.16148	0.977384	0.849422	0.447678	0.89414	1.13861	1.14324	0.696904	0.499381	0.181037	1.22104	0.199528	1.33306	2.8278	0.799534	0.52391
CI
	2.5 %.level_1	97.5 %.level_1	2.5 %.level_2	97.5 %.level_2
(Intercept)	0.0928528	2.09991	-0.563013	1.66499
L12	-0.690405	0.43359	-0.989069	0.24888
L13	-1.00009	0.738645	-0.583053	1.27398
L22	-0.276663	0.693959	-0.285081	0.805843
L23	-0.727477	0.925657	-0.516687	1.27523
L32	-0.359564	0.523697	-0.488542	0.495739
L33	-0.341202	1.14457	-0.432462	1.19862
L42	-0.813922	0.274481	-0.715987	0.485266
L43	-1.118	0.398666	-1.22519	0.445695
L52	-0.23062	1.26418	-0.23921	1.38149
L53	-5.42935	0.0846412	-4.41892	0.79701
L62	-0.162589	1.58609	-0.0198325	1.82928
L63	-1.09562	5.34633	-0.998419	5.45574
L82	-0.710266	0.31777	-0.587234	0.546982
L83	-2.40903	0.390979	-0.901656	1.6447
L92	-0.389031	0.784697	-0.498891	0.798275
L93	-0.637388	1.16797	-1.02324	0.977485
L102	-0.473013	0.418067	-0.658749	0.332351
L103	-1.59924	-0.105414	-1.628	0.0206374
L122	-0.475901	0.752831	-0.779563	0.555777
L123	-0.811215	1.13239	-0.929089	1.1887
L132	-0.351047	0.50599	-0.343694	0.611424
L133	-1.03972	1.1424	-1.59334	0.871124
L142	-1.45283	-0.214531	-1.37106	-0.0177097
L143	-3.02944	-0.326645	-3.30346	-0.114648
L152	-0.271173	0.734906	-0.360713	0.760127
L153	-1.20936	0.777789	-2.88317	-0.340427
L162	-0.289424	0.89225	-0.376901	0.951855
L163	-0.0102444	1.42612	0.258176	1.82082
L172	-0.622916	0.241498	-0.707618	0.260165
L173	-1.75781	0.239135	-1.72518	0.432307

## Sheet: Table S16
Folding of Antihelix
p_mul
	(Intercept)	L12	L13	L22	L23	L32	L33	L42	L43	L52	L53	L62	L63	L82	L83	L92	L93	L102	L103	L122	L123	L132	L133	L142	L143	L152	L153	L162	L163	L172	L173
level_1	0.00120056	0.894539	0.244886	0.0412143	0.862246	0.754688	0.673258	0.131355	0.857788	0.417098	0.992224	0.190769	0.877612	0.725491	0.0372196	0.350483	0.472274	0.0674358	0.701493	0.19887	0.587528	0.954617	0.417897	0.145408	0.972322	0.829937	0.594582	0.264685	0.552246	0.789225	0.463657
level_2	0.0258766	0.454447	0.323367	0.199433	0.11937	0.700848	0.954317	0.250434	0.684759	0.610949	0.998136	0.297153	0.784661	0.943186	0.163832	0.298745	0.863862	0.978564	0.484142	0.414372	0.610821	0.491281	0.0498089	0.165519	0.974777	0.106613	0.874803	0.390216	0.223343	0.790325	0.592478
Std.Error
	(Intercept)	L12	L13	L22	L23	L32	L33	L42	L43	L52	L53	L62	L63	L82	L83	L92	L93	L102	L103	L122	L123	L132	L133	L142	L143	L152	L153	L162	L163	L172	L173
level_1	0.535469	0.287249	0.436265	0.256556	0.472361	0.232062	0.372085	0.281375	0.403172	0.34698	1.49731	0.362819	1.4981	0.267883	0.622448	0.299588	0.460032	0.228192	0.429643	0.307031	0.501822	0.225742	0.487623	0.31008	0.785157	0.263312	0.527151	0.324949	0.362371	0.227024	0.509946
level_2	0.548783	0.301365	0.437386	0.267076	0.471114	0.238993	0.368959	0.289799	0.408273	0.356956	1.46099	0.363261	1.4694	0.273034	0.570242	0.309509	0.47458	0.236052	0.429156	0.313807	0.513767	0.231308	0.556098	0.317905	0.809024	0.274275	0.529664	0.327288	0.37358	0.233984	0.50847
z_value
	(Intercept)	L12	L13	L22	L23	L32	L33	L42	L43	L52	L53	L62	L63	L82	L83	L92	L93	L102	L103	L122	L123	L132	L133	L142	L143	L152	L153	L162	L163	L172	L173
level_1	3.23875	0.132563	-1.16286	-2.04137	0.173515	0.312464	-0.421681	-1.50878	-0.17919	0.811467	-0.00974648	-1.30831	0.153997	-0.351129	-2.08335	0.933652	0.718784	-1.82876	-0.383305	1.28478	0.542422	-0.0569101	-0.810076	-1.45594	0.0346958	0.214782	-0.532208	-1.11539	-0.594398	0.267317	-0.732838
level_2	2.22806	-0.748022	-0.987561	-1.28317	1.55742	-0.384176	0.0572864	-1.14929	0.405977	0.50872	-0.00233625	-1.04256	0.27325	-0.0712666	-1.3923	1.03913	0.17146	-0.0268687	0.699657	0.816225	0.508901	-0.688273	-1.9616	-1.38674	-0.0316171	1.61361	-0.157561	-0.859226	-1.21769	0.265889	-0.535248
OR
	(Intercept)	L12	L13	L22	L23	L32	L33	L42	L43	L52	L53	L62	L63	L82	L83	L92	L93	L102	L103	L122	L123	L132	L133	L142	L143	L152	L153	L162	L163	L172	L173
level_1	5.66467	1.03881	0.60211	0.59231	1.08542	1.0752	0.854789	0.654075	0.930303	1.3252	0.985512	0.622085	1.25949	0.910227	0.273412	1.32275	1.39189	0.658818	0.848161	1.48359	1.31285	0.987235	0.673672	0.636698	1.02762	1.05818	0.755365	0.695974	0.806225	1.06257	0.688178
level_2	3.39642	0.798175	0.649245	0.709849	2.08282	0.912273	1.02136	0.716724	1.18028	1.19912	0.996593	0.684737	1.49409	0.98073	0.452057	1.37936	1.08477	0.993678	1.35021	1.29193	1.29882	0.852823	0.335933	0.643487	0.974745	1.55671	0.919933	0.754867	0.634509	1.06419	0.761734
CI
	2.5 %.level_1	97.5 %.level_1	2.5 %.level_2	97.5 %.level_2
(Intercept)	0.684748	2.78375	0.147126	2.29832
L12	-0.524919	0.601076	-0.816092	0.365237
L13	-1.36238	0.347748	-1.28921	0.425316
L22	-1.02657	-0.0208847	-0.866162	0.180755
L23	-0.843849	1.00777	-0.189644	1.65709
L32	-0.382322	0.527344	-0.560234	0.376603
L33	-0.886174	0.572372	-0.702011	0.744283
L42	-0.976019	0.126952	-0.901058	0.234931
L43	-0.862448	0.717959	-0.634451	0.96595
L52	-0.398506	0.961631	-0.51803	0.881211
L53	-2.94927	2.92009	-2.86691	2.86008
L62	-1.18579	0.236433	-1.0907	0.333258
L63	-2.70552	3.16693	-2.47845	3.28148
L82	-0.619103	0.43098	-0.554596	0.515679
L83	-2.51675	-0.0767994	-1.9116	0.323707
L92	-0.30747	0.866892	-0.285007	0.928247
L93	-0.570982	1.23231	-0.848789	1.01153
L102	-0.864556	0.02994	-0.468997	0.456312
L103	-1.00677	0.677401	-0.540869	1.14139
L122	-0.207304	0.996237	-0.358914	0.871188
L123	-0.711354	1.25575	-0.745509	1.26842
L132	-0.455293	0.429599	-0.612559	0.294152
L133	-1.35074	0.560712	-2.18078	-0.000910783
L142	-1.05921	0.156287	-1.06394	0.182229
L143	-1.51164	1.56612	-1.61124	1.56008
L152	-0.459527	0.572636	-0.0949975	0.98014
L153	-1.31375	0.752643	-1.12158	0.954669
L162	-0.99933	0.274445	-0.922686	0.360258
L163	-0.925626	0.494841	-1.18711	0.277301
L172	-0.384271	0.505646	-0.396387	0.520815
L173	-1.37318	0.625767	-1.26874	0.724425

[truncated: 5 more sheets: Table S17, Table S18, Table S19, Table S20, Table S21]
