# Supplementary material for: DNA-based prediction of external ear morphology in the Chinese population: an exploratory study
Source: PeerJ. 2025 Oct 9;13:e20169. doi: 10.7717/peerj.20169 (PMC12515430; doi:10.7717/peerj.20169)
Supplement: Supplemental Information 3 — Genotypes from 15 SNPs and categorization of 13 ear qualitative phenotypes for participants. [file peerj-13-20169-s003.xlsx]

## Sheet: Sheet1
L1	rs10198822		Ph_1	Ear Protrusion
L2	rs6802174		Ph_2	Lobe Attachment
L3	rs74030209		Ph_3	Lobe Size
L4	rs17023457		Ph_4	Tragus Size
L5	rs17034666		Ph_5	Antitragus Size
L6	rs3827760		Ph_6	Inter-tragic Incisure
L8	rs7812632		Ph_7	Superior Helix Rolling
L9	rs1948400		Ph_8	Posterior Helix Rolling
L10	rs6699106		Ph_9	Folding of Antihelix
L12	rs263156		Ph_10	Antihelix Curvature
L13	rs3789101		Ph_11	Crus Helix Expression
L14	rs7771119		Ph_12	Superior Crus of Antihelix Expression
L15	rs62169501		Ph_13	Darwin’s Tubercle
L16	rs1619249
L17	rs1960918

## Sheet: Sheet2
Sample	L6	L4	L3	L2	L1	L10	L9	L5	L8	L15	L13	L12	L17	L14	L16	Ph_1	Ph_2	Ph_3	Ph_4	Ph_5	Ph_6	Ph_7	Ph_8	Ph_9	Ph_10	Ph_11	Ph_12	Ph_13
1	G	C/T	C	G	C/T	C/T	T/C	A	G	C/T	G	T/G	C	A/C	G/A	0	1	1	2	1	1	1	2	2	0	1	1	1
2	G	C/T	C	C/G	C/T	C/T	C	A	C	C/T	G	T/G	C/T	C	G	0	0	2	2	0	1	1	1	0	0	2	0	0
3	A	T	C	C	C	C/T	T/C	G/A	C/G	T	G	T	C/T	A	G/A	0	2	1	0	0	1	2	1	2	1	2	2	0
4	G	C/T	T	C	C/T	C/T	T/C	A	C	C/T	G/C	T/G	C	A/C	G/A	1	0	1	2	1	1	1	1	1	0	1	1	0
5	G	C/T	C	C/G	C	C/T	T	A	C	T	G	T/G	C	A/C	A	0	0	1	1	1	1	1	1	1	0	1	2	1
6	G	C/T	C	C/G	C/T	C/T	C	G/A	C/G	C/T	G	G	T	C	G	0	1	2	1	2	1	2	2	2	0	1	1	2
7	G	T	C/T	G	C	C/T	T/C	A	C/G	C/T	G	T/G	C	A/C	G/A	1	1	1	1	0	2	1	1	2	0	1	1	0
8	G	T	C	C/G	C/T	C/T	T	A	G	C/T	G	T/G	C	A/C	G/A	1	0	1	1	0	1	1	1	1	0	1	1	2
9	G	C/T	C	C	C	C/T	C	A	C	C	G/C	T/G	C	A/C	G	0	0	1	1	1	1	1	1	2	0	1	0	0
10	G	C	C/T	C/G	T	C/T	C	A	C	C	G	T/G	C	A/C	G	1	1	1	2	1	1	1	1	2	1	1	2	1
11	G	C	C	G	C/T	C/T	T	A	C	C	G/C	T	T	A/C	G/A	0	1	2	1	1	1	1	1	2	0	1	1	0
12	G	T	C	C	C/T	C	T/C	A	C	C	G	T/G	C	C	G/A	1	1	2	1	0	1	2	2	2	1	1	1	0
13	G/A	T	C	C/G	C/T	C	T/C	G/A	C	C	G	G	C/T	C	G/A	0	1	1	2	2	1	1	1	1	0	1	1	1
14	G	T	C/T	C/G	C	C	T/C	A	C	T	G/C	T/G	C/T	A/C	G	0	0	1	1	0	1	1	1	1	0	1	1	0
15	G	T	C/T	G	C/T	C/T	T	A	C/G	C/T	G	T/G	C	C	G	0	1	1	1	0	0	1	2	1	1	1	0	2
16	G	T	T	C/G	C/T	C/T	T/C	A	C/G	C/T	G/C	T/G	C/T	C	G	0	1	1	1	0	2	1	2	1	0	1	1	2
17	G	C	C	C	T	C/T	C	A	C/G	C	G/C	T/G	C	A/C	G/A	0	1	1	2	1	1	1	1	2	1	1	1	0
18	G	C/T	C	C/G	C/T	C/T	T/C	A	G	C/T	G	T/G	C/T	A/C	G/A	1	0	1	2	1	1	1	2	0	0	1	1	0
19	G	C	C	G	C	C/T	T	A	C/G	T	G	T	C/T	A	G/A	1	1	1	2	2	1	0	0	2	0	0	2	0
20	G	C/T	C	C/G	C/T	T	T/C	A	C	C/T	G/C	G	C	C	G/A	0	0	2	1	0	1	2	0	2	0	1	1	0
21	G/A	C/T	C/T	G	C/T	C/T	T	G/A	G	C	G	G	C	C	G/A	1	0	0	1	2	1	1	1	2	0	1	1	1
22	G/A	C/T	C/T	G	C/T	C	T	A	C/G	C/T	G	G	C/T	C	G	1	0	1	1	2	1	1	1	1	0	2	2	0
23	G	C	C	C/G	C/T	C/T	T/C	A	C/G	C/T	G/C	T/G	C/T	C	A	1	1	1	1	2	0	2	1	1	2	0	0	0
24	G	C/T	C/T	C	C/T	C/T	T	A	C	C	G	G	C	C	G/A	0	1	1	1	0	1	1	1	0	1	1	1	0
25	G	T	C	C/G	C/T	C/T	T/C	A	G	C/T	G	T/G	C/T	A/C	G	0	1	1	1	1	1	2	0	0	0	1	1	0
26	G	C	C/T	G	T	C/T	T	A	C	C	G/C	T/G	C	C	G/A	0	1	0	1	1	1	1	2	2	0	2	1	0
27	G	C/T	C/T	C/G	C/T	C/T	T/C	A	C	C/T	G	T/G	C/T	C	G/A	0	1	1	0	0	1	1	1	2	0	2	2	0
28	G/A	C	C/T	C/G	C/T	C	T	A	C	C/T	G/C	T/G	C/T	A/C	G/A	0	1	1	1	0	0	2	2	2	0	1	1	2
29	G	C/T	C	C/G	T	C	T	A	C	C	G	G	C	C	A	2	0	2	1	0	1	2	1	2	0	1	2	0
30	G	T	C/T	C/G	T	C/T	T	A	C/G	C	G	T	C	A/C	G/A	0	1	1	1	0	0	1	1	1	2	1	0	0
31	G	C	T	C	T	C/T	T/C	A	C/G	C	G/C	T	C	A/C	G	0	1	0	1	2	1	1	1	1	1	2	1	0
32	G/A	T	C	C/G	C/T	C/T	T/C	G/A	C	C	G	G	C	A/C	G/A	1	0	1	1	1	1	2	2	1	0	1	1	2
33	G/A	C/T	T	C	T	T	C	G/A	C	C	G/C	G	C	A/C	G/A	0	1	2	1	1	1	2	2	2	0	0	1	0
34	A	C/T	C/T	C	C/T	C/T	C	G	C	C	G	G	C	C	G	2	2	1	1	0	2	2	0	2	2	2	2	2
35	G	T	T	C	C	C	T/C	A	C	T	G	T/G	C	A/C	A	1	0	1	2	2	0	1	2	2	1	1	2	1
36	G/A	C	C	C/G	C	C	C	G/A	C/G	C/T	G	T/G	C/T	A/C	G/A	0	0	2	1	0	1	2	1	2	0	1	2	0
37	G/A	T	C	C/G	C/T	C	C	G/A	C/G	C/T	G	T/G	C/T	A/C	G	1	1	1	2	0	1	1	2	2	0	1	2	0
38	G	C	C	C/G	C/T	C/T	T	A	C/G	C	G	T/G	C/T	A/C	G/A	1	0	1	1	1	1	1	1	0	0	0	1	0
39	G	T	C/T	G	T	C	T	A	C	C	G	T/G	C	C	G/A	0	1	1	1	0	1	2	1	1	0	1	1	1
40	G	T	C	C/G	T	C	T/C	A	C/G	C	G/C	T/G	C	A/C	G/A	1	0	0	1	0	1	1	1	1	1	1	1	2
41	G	C/T	C/T	C/G	C/T	T	T/C	A	C	C/T	G/C	G	C/T	C	G/A	0	0	1	0	1	1	2	1	2	0	1	2	0
42	G	C/T	C	C/G	C/T	T	C	A	C	C	G/C	T/G	C	A/C	G/A	1	1	1	1	1	1	1	1	1	0	0	2	2
43	G	C/T	T	C/G	T	C	C	A	C/G	C	G	G	C/T	C	G/A	2	1	0	1	1	1	1	2	0	1	2	1	0
44	G	C/T	C/T	C/G	C	C	T/C	A	C/G	C/T	G	G	C	C	G/A	2	1	0	2	0	1	2	2	2	1	1	2	2
45	G	C	C/T	C/G	T	C/T	T/C	A	C	C	G/C	T/G	C	A/C	G/A	1	1	2	1	1	1	1	1	2	1	1	1	0
46	G/A	C	C	C/G	C/T	C/T	T/C	A	C/G	C	G/C	G	C/T	C	G/A	0	1	2	1	0	1	2	2	1	0	1	2	0
47	G	C	C/T	G	T	T	T/C	A	C	C	G/C	T/G	C	C	A	0	0	2	1	2	1	2	2	2	0	1	2	0
48	G	T	C/T	C/G	C/T	C/T	T/C	A	G	C	G/C	T/G	C	A/C	A	1	2	1	0	0	2	1	1	0	1	1	0	0
49	G	T	C/T	C/G	T	C/T	T/C	A	C	C	G	G	C	C	G	0	1	2	1	1	0	2	1	2	0	0	2	0
50	G	C/T	C/T	C/G	C/T	C/T	T/C	A	C	C/T	G	T/G	C	C	A	2	1	1	1	0	1	2	2	2	0	1	1	2
51	G	C/T	C/T	C	C/T	C	C	A	C	C/T	G/C	G	C/T	C	G/A	2	1	0	1	0	1	1	1	2	1	1	2	1
52	G	C	C	G	C/T	T	T	A	C	C/T	G/C	T/G	C	C	A	1	1	2	1	0	1	2	2	1	0	2	1	0
53	G	C	C	C/G	T	C/T	T/C	A	C/G	C	G/C	T/G	C	C	A	2	1	1	1	0	0	1	1	2	0	1	2	1
54	G/A	C/T	C	G	T	C	T/C	G/A	C	C	G	T/G	C	A/C	G	0	1	1	1	1	1	2	1	2	0	1	1	2
55	G	C/T	C/T	C/G	C/T	T	T/C	A	C	C/T	G/C	T/G	C	A/C	G/A	1	1	1	1	1	1	0	1	2	1	1	2	0
56	G	T	C	C/G	T	T	C	A	C/G	C	G/C	G	C	C	A	1	1	0	0	1	2	2	0	2	0	1	2	0
57	G	T	C	C	C	C	T/C	A	C	T	G/C	T/G	C	A/C	G/A	0	1	1	1	0	0	1	1	2	2	1	1	0
58	G	T	T	G	C/T	C/T	T	A	C/G	C	G/C	T/G	T	C	G/A	1	1	2	1	2	1	1	2	2	0	1	1	1
59	G	C/T	C	G	T	C	T	A	C	C	G	G	C	C	G/A	1	1	1	1	1	1	1	2	1	0	1	1	0
60	G	T	C/T	C	C/T	C	C	A	C	C	G	T	T	A/C	G/A	1	0	2	1	0	1	2	1	2	0	0	1	0
61	G	C/T	C	C	C/T	C/T	C	G/A	C	C	G/C	T/G	C/T	C	G	1	0	2	1	1	1	2	1	2	0	1	1	0
62	G	T	C	G	C	C/T	C	A	G	C/T	G	T/G	C	A/C	G/A	0	1	2	1	1	1	2	0	2	0	1	2	0
63	G	C/T	C	C/G	C	C	T/C	A	C	T	G	G	C/T	C	G/A	2	0	1	1	0	0	1	1	0	2	1	0	0
64	G/A	C/T	C	C/G	C/T	C/T	C	A	C/G	C	G	T/G	C	A/C	A	0	0	2	1	0	1	2	1	1	1	1	1	0
65	G	C/T	C	G	T	C	T	A	C	C	G/C	G	C	C	A	0	0	1	1	0	1	1	1	1	0	1	0	0
66	G	C	C	G	C	C/T	T	A	C/G	T	G/C	T/G	C	C	G/A	0	2	2	1	1	1	2	1	0	0	0	1	0
67	G	T	C/T	C/G	T	C	T	A	C	C	G/C	T/G	T	A/C	G/A	0	1	2	1	1	1	2	0	1	0	1	0	0
68	G/A	C/T	T	C/G	C	C	T/C	A	C	T	G	G	C	C	G	1	0	1	1	0	2	1	1	0	0	0	1	0
69	G	C/T	C/T	G	T	C/T	T	G/A	C	C	G/C	T	C	A/C	G/A	1	1	1	0	0	1	2	1	2	1	1	1	0
70	G	C	C	G	T	C	T	A	C/G	C	G	G	C	C	G/A	0	1	1	1	1	1	2	1	0	0	0	1	0
71	G	C	C	C/G	T	C	T/C	A	C/G	C	G/C	G	T	C	G/A	1	0	1	1	0	1	0	2	2	0	2	1	0
72	G	C	C	G	T	C	T	A	C	C	G/C	G	C/T	C	G/A	2	1	1	0	0	1	0	1	1	0	1	0	0
73	G	C	C	G	C/T	C/T	T/C	A	C	C	G/C	G	C	C	G/A	1	1	1	1	1	1	1	1	1	0	0	1	2
74	G	T	C/T	C/G	T	C	T	A	C/G	C	G/C	T/G	C	C	G/A	1	1	2	1	0	1	2	2	1	0	1	1	1
75	G	T	C	C	T	C/T	T/C	A	C/G	C	G	T	C	C	G/A	0	1	1	1	0	1	2	1	2	1	1	1	0
76	G	C/T	C/T	C	C	C	T/C	A	C	C/T	G	T/G	C	C	G	0	0	1	1	0	0	2	1	2	2	1	1	0
77	G	C/T	C/T	C	C	C/T	C	A	C/G	T	G/C	T/G	C/T	C	G	1	1	1	1	2	1	2	1	1	1	2	1	0
78	G/A	C/T	C	C/G	C/T	C	T/C	G/A	C	C/T	G/C	G	C	C	G/A	1	1	2	1	0	2	2	1	0	0	0	1	0
79	G	T	C/T	G	C/T	C	T	A	C	C	G/C	T/G	C/T	A/C	G/A	1	1	1	1	0	1	1	0	1	0	1	2	0
80	G	C	T	C/G	C/T	C/T	T	A	C	C/T	G/C	G	C/T	C	G	1	1	1	1	2	1	1	1	2	0	2	1	0
81	G	C	C	C/G	C	C/T	T/C	A	C/G	C/T	G	T/G	C	A/C	G	0	1	2	1	2	1	2	2	2	1	1	2	0
82	G	C/T	C/T	G	T	C	T	A	C	C	G/C	G	C	C	A	1	1	1	1	2	1	1	1	1	0	1	1	0
83	G	T	C/T	G	C/T	C/T	T	A	C	C/T	G	G	C/T	C	G/A	1	0	1	1	0	2	0	1	2	0	1	1	0
84	G	C/T	T	G	C	C/T	T	A	C	T	G	G	C	C	G/A	0	1	1	2	0	1	0	1	1	0	0	1	0
85	G	C/T	C	C/G	T	C/T	T/C	A	C	C	G	G	T	C	A	1	1	1	1	0	1	2	2	2	1	1	1	1
86	G	C/T	C/T	C/G	C/T	C/T	T/C	G/A	C/G	C/T	G	G	C	C	A	1	0	1	1	0	1	1	1	0	0	1	0	0
87	G	C/T	T	C/G	T	C/T	T/C	A	C	C	G	T/G	C	A/C	G/A	1	1	1	1	0	1	1	1	2	1	1	0	0
88	G	C/T	C/T	C	C	C/T	T/C	A	C	T	G	G	C	C	G/A	0	1	2	1	0	0	1	1	2	1	0	1	0
89	G	C	C	C/G	C/T	C/T	T	A	C/G	C	G/C	T/G	C	C	G/A	1	1	1	1	1	0	1	1	1	1	1	1	0
90	G	C	C/T	C	T	C/T	T/C	G/A	C/G	C	G/C	T/G	C/T	A/C	A	0	0	0	0	1	2	2	2	2	1	1	2	0
91	G	T	C	G	C	C	T	G/A	C/G	T	G	T/G	C	A/C	G/A	0	1	2	1	2	1	1	1	2	0	1	2	0
92	G	T	C	C/G	T	C	T/C	A	C	C	C	T/G	C/T	A/C	G/A	1	1	1	1	2	2	1	1	2	0	1	1	1
93	G	T	T	C/G	C	C	T/C	G/A	C	C/T	G	T/G	C/T	A/C	G/A	0	0	1	1	1	2	1	1	2	1	0	1	0
94	A	T	C	C	T	C/T	T/C	G	C	C	G	T/G	T	C	A	1	1	2	2	1	0	1	2	0	0	0	0	1
95	A	T	C	C	C/T	C	T/C	G	C	C/T	G	T/G	T	C	A	1	0	0	0	1	1	0	1	1	1	0	1	0
96	G	C/T	C/T	C/G	C/T	C	T/C	A	C	C	G	G	C	C	G/A	1	1	1	2	1	1	1	1	1	1	0	1	0
97	G/A	C	C/T	C/G	C	C	T/C	A	C	T	G	G	C/T	C	A	1	1	0	1	0	2	1	1	2	2	1	1	0
98	G	C/T	C/T	G	C	C	T/C	A	C	C	G	T/G	C/T	C	G	1	0	2	1	1	1	2	2	2	1	1	1	0
99	G	C/T	C	C	C	C	T/C	A	C	T	G	G	C	C	G	1	0	1	1	0	0	2	1	2	1	1	0	0
100	G/A	T	C	C/G	C	C/T	T/C	G/A	C/G	T	G	T/G	C	A/C	G	1	1	1	0	2	1	2	2	1	1	1	1	0
101	G	T	C	C	C/T	C	T/C	A	C/G	C	C	T/G	C	C	A	1	1	1	0	0	2	2	1	0	0	2	0	0
102	G	T	C	C	C/T	C/T	T/C	A	C/G	C/T	G/C	G	C/T	C	G/A	1	1	1	1	0	1	1	1	2	0	1	1	0
103	G	T	C	C	C/T	C	T/C	A	C/G	C	G/C	G	C/T	C	G/A	0	2	1	1	0	1	2	1	1	1	1	2	0
104	G/A	T	C	C/G	C/T	C/T	T/C	A	C	C/T	G	G	C/T	C	G	1	0	1	1	2	0	1	1	2	1	1	2	0
105	G	T	C/T	G	C/T	C	C	A	C	C/T	G/C	T/G	C/T	A/C	G/A	1	1	1	1	0	0	2	2	2	0	2	1	1
106	G	T	C/T	G	T	C	T	A	C	C	G	G	C/T	C	A	1	1	1	1	0	0	1	2	2	1	1	1	0
107	G	C	C/T	C	C	C/T	T/C	A	C	C/T	G	T/G	T	A/C	A	0	1	1	1	1	0	1	0	2	1	1	1	0
108	G/A	C	C	G	C/T	C	T	A	C	C/T	G/C	G	C	C	G/A	0	1	1	1	0	2	2	1	1	0	0	1	0
109	G/A	T	C/T	C/G	C/T	C	T/C	G/A	C	C	G	T	C/T	A/C	G/A	0	1	0	2	0	2	2	1	2	0	1	1	1
110	G	C	C	C/G	C/T	C	T/C	A	C	C	G	T/G	C	A/C	G/A	0	1	1	1	1	0	2	0	2	1	1	1	0
111	G	C/T	C	C/G	T	C/T	T	A	C/G	T	G/C	G	C	C	G	2	0	1	1	2	1	1	0	2	0	2	1	0
112	G	T	C	G	C/T	C	T	A	C	C/T	G/C	T	C/T	A	G/A	0	0	2	1	0	2	2	1	1	0	1	0	2
113	G	C/T	C	G	C/T	C/T	T/C	A	C	C/T	G	T/G	C/T	A/C	A	0	0	1	1	1	1	1	0	2	1	1	1	0
114	G	C/T	C	C	C/T	C	C	A	C	C/T	G	G	C	C	G/A	1	0	1	1	2	1	1	1	2	0	1	1	0
115	G	C/T	C	C	C/T	C	T/C	A	C/G	C/T	G	T/G	C/T	A/C	A	0	0	0	1	0	2	1	1	2	2	1	1	0
116	G	C/T	C	C	T	C/T	T/C	A	C	C	G	T/G	C	A/C	G	0	1	1	1	1	1	2	2	1	0	1	1	0
117	G/A	C	C/T	C	C/T	C	C	G/A	G	C/T	G/C	T	C	A	A	1	1	1	1	0	2	2	2	0	0	1	1	1
118	G/A	C/T	C	C	C/T	C/T	T/C	G/A	C/G	C/T	G/C	T	C	A	G/A	1	1	1	1	2	1	2	1	2	0	0	1	0
119	G/A	C/T	T	C/G	C	C	T	A	C/G	C/T	G	G	T	C	G	0	1	1	1	0	0	1	2	2	0	1	1	2
120	G	C/T	C/T	C/G	C/T	C/T	T/C	A	C	C/T	G	T/G	C	C	G/A	0	0	2	1	0	0	1	1	2	1	1	2	0
121	G/A	T	C/T	C	C/T	C/T	T/C	A	C/G	C	G	G	C/T	C	G	0	0	1	1	0	0	2	1	2	0	1	1	0
122	G	C/T	C/T	C	T	C/T	T/C	A	C	C/T	G/C	T/G	C	A/C	G/A	0	1	1	1	0	1	1	1	1	1	1	1	0
123	G	T	C	C	C/T	C/T	T/C	A	C/G	C	G	T/G	C	C	G/A	1	1	1	1	1	1	1	1	0	0	1	1	0
124	G	C/T	C/T	C	T	C/T	C	A	C	C	G/C	G	C	C	G/A	0	1	1	1	1	1	2	1	1	0	1	1	0
125	G	T	C/T	C/G	C	C/T	T/C	A	C	C/T	G/C	T	C	A/C	G	2	1	1	1	1	2	1	2	2	0	1	1	0
126	G	T	C/T	C/G	C/T	C/T	T/C	A	C/G	C	G	T/G	C/T	A/C	A	1	0	1	1	0	0	1	1	2	0	1	1	0
127	G	T	C	C	T	C	T	A	C	C	G/C	G	C/T	C	G/A	0	0	0	1	2	1	0	1	2	1	1	1	2
128	G	T	C/T	C	C/T	C/T	C	A	C/G	C/T	G/C	T	C/T	A/C	A	0	0	1	2	0	0	1	1	2	0	1	1	0
129	G	C	C/T	C/G	T	C	T	A	C/G	C	G/C	T/G	C/T	C	G	0	1	1	1	2	1	2	2	1	0	1	1	0
130	G	C/T	C	C/G	C/T	C	T	G/A	C	C	G	G	C/T	C	G	0	1	1	1	1	0	1	1	1	1	1	2	0
131	G	C/T	C	C/G	C/T	C/T	T/C	G/A	C	C	G	T/G	C/T	A/C	G/A	2	1	0	1	2	2	1	2	0	0	1	1	0
132	G/A	C	C/T	C	T	C	C	G/A	C	C	C	T	C	A/C	G/A	0	0	1	1	0	1	1	0	1	1	1	1	0
133	G	C	C	C	T	C/T	C	A	C	C	G/C	T/G	C	C	G/A	1	1	1	1	0	1	2	0	1	1	2	1	0
134	G	C/T	C/T	C	T	C	C	A	C	C/T	G	T	C/T	A/C	A	0	1	1	1	1	1	1	1	2	0	1	1	0
135	G	T	C	G	C/T	C	T	A	C	C/T	G	T	T	A/C	G/A	0	1	1	0	2	1	1	0	2	1	1	1	0
136	G	C/T	C	C/G	T	C	T/C	A	C/G	C	G/C	T/G	C/T	C	G/A	2	1	1	1	2	1	2	1	1	2	1	1	0
137	G/A	T	C/T	C/G	T	C/T	T	A	C	C	G/C	G	C/T	C	G	2	1	1	1	2	1	1	2	2	1	1	1	0
138	G	C/T	C	G	C	C/T	T	A	C	C	G	T/G	C	A/C	G/A	0	1	2	1	2	1	1	1	2	0	1	2	0
139	G	T	C/T	C	T	T	C	A	C/G	C	G	T/G	C	A/C	G	2	1	1	1	0	2	1	2	0	1	0	0	0
140	G	C/T	C	C/G	T	C	T/C	A	C/G	C	G/C	G	C	C	A	0	1	1	1	0	1	2	1	1	1	1	2	0
141	G	T	C/T	C	C/T	C	T	A	G	C	G	T/G	C/T	A/C	G/A	1	1	1	1	1	1	2	0	1	0	1	1	0
142	G	C	C	G	T	C/T	T	A	C	C	C	T/G	C/T	A/C	A	1	1	1	1	1	0	1	1	2	1	1	1	0
143	G/A	C	T	C/G	C/T	C	T/C	A	C	C	G/C	G	C/T	C	G	1	1	1	1	0	1	1	1	2	0	1	2	0
144	G/A	C	T	C/G	C	C/T	T/C	A	C/G	C/T	G/C	G	C/T	C	G	1	2	0	1	0	2	0	1	2	1	1	1	0
145	G	C/T	C	C	C/T	C	C	A	C	C/T	G	T/G	C/T	A/C	A	0	0	2	0	0	2	1	1	1	0	1	1	1
146	G/A	T	C	C/G	C/T	C	T/C	A	C/G	C/T	G/C	G	C	C	G/A	0	1	2	1	2	0	2	2	2	0	1	1	0
147	G	C/T	C	C/G	T	C/T	T/C	A	C	C	G/C	G	C	C	A	0	1	1	1	2	1	1	1	0	0	1	0	0
148	G	T	C	C	C	C/T	C	A	C/G	T	G	T/G	C	C	G/A	2	1	1	1	0	2	1	1	2	1	1	1	0
149	G	C/T	C/T	C/G	C/T	C/T	T/C	A	C/G	C/T	G/C	G	C	C	A	1	1	1	1	0	1	1	2	2	2	1	1	0
150	G	T	C	C/G	T	T	T	A	C/G	C	G	T/G	C	A/C	G/A	0	0	2	1	0	0	1	1	2	1	1	1	0
151	G	T	C	G	T	C/T	T	A	C	C	G/C	G	C	C	G	0	0	1	1	0	1	2	1	2	1	1	1	0
152	G	C/T	C/T	C	T	C/T	C	A	C/G	C	G	T/G	C/T	A/C	A	0	0	0	1	2	0	1	2	2	1	2	2	0
153	G	T	C	C/G	T	C	T/C	A	C/G	C	G	T	C/T	A/C	G/A	0	1	0	1	2	1	1	2	2	2	2	2	0
154	G	C/T	C/T	C/G	C/T	C/T	T/C	A	C	C/T	G	T/G	C/T	A/C	G/A	0	1	1	1	1	0	2	1	2	1	1	1	0
155	G	C/T	C/T	G	C/T	C/T	T/C	A	C	C/T	G	T	C/T	A/C	G	1	1	1	1	1	0	1	1	2	1	1	1	0
156	G	T	T	C/G	T	C/T	T/C	G/A	C/G	C	C	T/G	C	A/C	G/A	1	0	1	1	1	0	1	1	2	0	1	1	0
157	G	C	C/T	C/G	C/T	C/T	T/C	A	C	C/T	C	G	C	C	G/A	1	0	2	1	1	1	1	1	1	0	1	1	0
158	G	C	C/T	C	C/T	C	T/C	G/A	C	C	C	T/G	C	C	G/A	0	0	1	1	1	2	1	1	1	2	2	0	0
159	G/A	T	C/T	C	T	C	T/C	A	C	C	G	T/G	C	C	A	0	1	1	1	1	1	1	1	1	2	1	1	0
160	G	T	T	C/G	T	C	T	A	C	C	G	G	C	C	G/A	1	1	1	2	2	0	2	2	1	0	1	1	0
161	G	C/T	C/T	G	C	C/T	T	A	C	T	G	G	C/T	C	G	0	1	1	1	0	1	1	0	2	2	1	2	0
162	G	T	C	C/G	C/T	C	T/C	A	C	C/T	G/C	T/G	C/T	A/C	A	2	2	1	0	2	0	2	1	1	0	1	2	1
163	G	T	C	G	T	C	T/C	A	C	C	G	T/G	C	A/C	G/A	1	1	1	1	0	0	1	1	2	0	1	1	0
164	G	C/T	T	C	C	C	C	A	C/G	T	G	T/G	C/T	C	A	1	1	1	1	1	0	1	2	1	0	1	1	0
165	G	C/T	C/T	G	C/T	C	T	A	C/G	C/T	G	T/G	C	A/C	G/A	0	2	1	1	1	0	1	0	1	1	1	1	0
166	G	C/T	T	C/G	T	C/T	C	A	C/G	C	G	T/G	C	A/C	G/A	2	0	1	1	1	1	0	1	1	0	2	1	0
167	G	C/T	C/T	C	T	C	T/C	A	C	C	G	T/G	C/T	A/C	G/A	2	0	1	2	2	1	2	1	1	1	2	1	0
168	G/A	C/T	T	C/G	C/T	C	C	A	G	C/T	G/C	G	C/T	C	G	1	1	1	1	2	1	2	2	0	0	0	1	0
169	G/A	C/T	C	C/G	T	C	T/C	A	C	C	G	G	C/T	C	G/A	2	2	1	2	0	1	2	2	2	0	2	1	0
170	G	T	C	C/G	T	C	T/C	A	C	C	G	G	C	C	G/A	0	0	1	2	1	1	2	2	1	0	2	2	0
171	G/A	C	C	G	T	C/T	T	A	C/G	C	G/C	T/G	C	A/C	G/A	1	0	2	1	2	0	1	0	2	0	2	1	0
172	G	C	C	C	C/T	C/T	C	A	C	C/T	G	G	C/T	C	G	0	0	2	2	1	0	1	1	0	2	0	1	0
173	G	C/T	T	C/G	T	C/T	C	A	C/G	C	G	T/G	C	C	G/A	2	1	2	1	0	2	1	1	0	0	0	1	0
174	G	T	C	G	T	C	T	A	C	C	G	T/G	C	A/C	G	2	1	1	2	0	0	2	2	1	0	1	1	0
175	G	C	C/T	C/G	T	C	C	A	C/G	C	C	G	C/T	C	A	0	1	2	0	0	1	2	2	1	1	1	1	0
176	G	C/T	C	C	T	C	C	A	C	C	G/C	T/G	C/T	C	G/A	0	0	2	1	1	2	2	1	2	1	0	1	0
177	G	C/T	C/T	C	C	C/T	T/C	G/A	C/G	C/T	G/C	T/G	C/T	C	G/A	2	1	1	0	0	2	0	0	1	0	0	1	0
178	G/A	C/T	T	C	C/T	C	C	A	C/G	C/T	G/C	T/G	C	A/C	G/A	2	0	2	1	0	0	1	0	0	0	0	2	0
179	G	C	C	C/G	C	C/T	T/C	A	C	C/T	G/C	G	C	C	G/A	2	0	1	1	1	2	1	2	0	1	2	1	0
180	G/A	C	C	C/G	C/T	T	T/C	G/A	C	C	G/C	T/G	C/T	A/C	G/A	0	0	2	2	1	0	2	2	1	1	1	1	0
181	G	C	C/T	C	C/T	C	T/C	A	G	C	G/C	T/G	C/T	A/C	A	0	1	1	2	0	1	2	2	2	0	2	1	2
182	G/A	C	C	C	T	C/T	C	A	C/G	C	G	T/G	C/T	C	G	1	0	1	1	0	2	1	2	0	2	1	1	0
183	G	T	C/T	C/G	T	C/T	T	A	C	C	G/C	T/G	C/T	C	G	0	2	2	0	1	0	1	0	2	0	1	1	0
184	G	T	C	C/G	C/T	C/T	T/C	A	C	C	G/C	G	C	C	G	2	0	1	1	0	1	2	0	1	1	2	0	0
185	G	C	C	C/G	C/T	T	T/C	A	C	C/T	G	G	C	C	G	0	1	1	1	1	1	2	0	2	2	2	1	0
186	G	C	C	C/G	C	C/T	T/C	A	C	C/T	G/C	G	C	C	G	0	0	1	2	1	1	0	0	1	1	0	0	0
187	G/A	T	C/T	C/G	C/T	C/T	T/C	G/A	G	C/T	G	G	C/T	A/C	G/A	0	1	1	2	0	1	1	2	1	2	0	1	0
188	G/A	C/T	C/T	C	C	C/T	T/C	G/A	C	T	G	G	C	C	G/A	1	2	2	2	1	2	1	1	1	1	2	0	0
189	G	T	C	G	T	C/T	T	A	C/G	C	G/C	T/G	C/T	A/C	G/A	0	1	2	2	2	0	2	1	2	0	1	2	0
190	A	C/T	T	C/G	C/T	T	T/C	G/A	C	C/T	G	T/G	C/T	A/C	G/A	0	0	2	1	2	0	2	1	1	0	1	1	0
191	G	C/T	C/T	C/G	C/T	C/T	T/C	A	C/G	C/T	G/C	T/G	C	C	G/A	2	1	1	2	2	1	2	2	2	0	2	2	0
192	G	C/T	C/T	G	C/T	C	T	A	C	C/T	G	T/G	C/T	C	G/A	1	1	1	0	1	2	2	1	2	2	2	0	1
193	G	C	C	C/G	T	C/T	T/C	A	C	C	G/C	T/G	C/T	C	G/A	1	0	1	1	1	1	2	2	2	0	1	1	0
194	G	C	C	C/G	T	T	T/C	A	C/G	C	G/C	G	C/T	C	G	2	0	1	1	1	1	2	0	2	1	2	1	0
195	G/A	C	T	C/G	C/T	C	C	G/A	C	C	C	G	C	C	G/A	0	0	1	2	1	1	2	2	1	2	2	2	2
196	G/A	C/T	C	C/G	C	C/T	T/C	A	C	C/T	G	G	C	C	A	1	1	2	2	2	0	1	0	0	2	1	0	0
197	G	C/T	C	C/G	C	T	T	A	C	C	G	T/G	C	A/C	G/A	1	1	1	2	2	0	2	2	1	1	0	1	1
198	G	C/T	C/T	C	T	C/T	C	A	C	C	G/C	G	C	C	G	1	1	1	1	0	2	0	2	1	0	1	1	0
199	G/A	C	C	C/G	T	C	C	A	C	C	G	G	C	C	A	0	1	1	2	2	2	2	0	2	2	1	1	0
200	G	C/T	C/T	C/G	C/T	C/T	C	A	C	C	G	T/G	C/T	C	G/A	0	1	1	2	2	1	2	0	0	2	1	1	0
201	G	C/T	C	C/G	C	C/T	T/C	A	C/G	T	G/C	G	C/T	C	A	0	1	1	2	2	0	2	2	1	0	1	0	2
202	G	T	C/T	C/G	C/T	C/T	T/C	A	C/G	C/T	G	T/G	T	C	A	0	0	0	1	0	1	1	1	1	1	0	2	1
203	G	C/T	C	G	C/T	C/T	T/C	A	C	C	G/C	G	C	C	G/A	1	0	2	1	1	0	2	1	2	0	0	0	1
204	G	C/T	C/T	C/G	T	C	T/C	A	C/G	C	C	G	C/T	A/C	A	0	0	1	2	0	1	1	1	1	2	2	2	2
205	G/A	C/T	C	G	C	T	T/C	G/A	C	T	G/C	T/G	C	A/C	G	2	1	1	1	0	2	1	1	0	2	2	1	0
206	G	C/T	C	C	T	C/T	C	A	C	C	G/C	G	C	C	G/A	1	0	1	1	1	1	2	1	1	2	0	0	0
207	G	T	C	C	C/T	C	T/C	A	C	C	G/C	T/G	C/T	C	G/A	0	0	1	1	0	2	2	1	1	2	0	1	0
208	G	T	C/T	C/G	C/T	C	T/C	A	C	C	C	T	C/T	C	A	2	1	1	0	0	2	2	2	1	2	1	2	0
209	G	T	C/T	C/G	C	C	T/C	A	C	C/T	C	T/G	T	C	G/A	1	1	1	0	0	2	1	2	0	2	1	1	0
210	G/A	C/T	C	C/G	C/T	C/T	C	A	C/G	C/T	G	T/G	T	C	G	2	1	1	0	0	1	1	1	1	1	2	1	0
211	G/A	C/T	C	C/G	C/T	C/T	T/C	A	G	C/T	G	G	T	C	G/A	2	1	1	1	1	1	2	2	2	0	2	2	2
212	G	C/T	T	C/G	C	C/T	T/C	A	C	C/T	C	T/G	C/T	A/C	G/A	1	0	1	0	0	1	1	1	0	2	1	2	0
213	G/A	C/T	C/T	G	C/T	C	T/C	G/A	C	C	C	G	C/T	C	G/A	2	0	1	1	0	1	2	0	0	2	0	1	0
214	G	C/T	C/T	C/G	C/T	C	T/C	A	C	C/T	G	G	C	C	G/A	2	2	0	1	2	1	2	1	2	0	1	2	0
215	G	T	C	C	C/T	C/T	T/C	A	C	C/T	G	G	C/T	C	G/A	1	0	1	1	1	1	1	1	1	0	1	1	0
216	G	T	T	C/G	T	C/T	T/C	A	C/G	C	G	G	C/T	C	G	1	2	1	2	1	1	1	0	1	0	1	1	0
217	G	C/T	C	C	T	C/T	C	A	C/G	C	G	T/G	C/T	C	A	1	0	1	1	0	1	1	2	1	2	1	1	0
218	G	T	C	C/G	C	T	T/C	A	C/G	C	G	G	T	C	G/A	1	2	1	2	1	0	1	0	1	2	0	2	0
219	G	C/T	C/T	C/G	T	C	T/C	A	C/G	C	G/C	T/G	C	C	A	0	1	1	1	0	1	2	1	2	0	1	1	0
220	G	C/T	C/T	C/G	T	T	C	A	C	C	G/C	G	C/T	C	A	1	0	1	0	0	0	0	0	0	0	1	1	0
221	G	C	C/T	G	T	C/T	T/C	A	C/G	C	G	T	C	A/C	A	2	2	1	2	2	1	2	1	0	0	1	2	0
222	G	C	C	C/G	C/T	T	T/C	A	C/G	C/T	G	T/G	C/T	A/C	G	0	1	2	2	1	0	2	0	1	2	0	2	0
223	G	C/T	C	C/G	T	T	T/C	A	C/G	C	G/C	T/G	C/T	A/C	G	0	1	2	1	1	0	2	0	1	2	0	1	0
224	G	C	C	C/G	C/T	C	T/C	A	C	C/T	G	T/G	C	C	G/A	1	1	1	2	0	2	2	1	1	2	1	1	2
225	G	C/T	C/T	G	C/T	C/T	T/C	G/A	C	C	G	T/G	T	C	G	2	2	0	0	1	1	1	2	2	0	2	2	0
226	G	C	C	C/G	C/T	C/T	T/C	A	C/G	C/T	G/C	T/G	T	C	G/A	0	1	2	0	1	0	2	1	0	2	2	1	0
227	G	C/T	C	C	C/T	C	T/C	A	C	C/T	G/C	T/G	C/T	A/C	A	0	0	1	2	1	1	2	2	1	0	1	1	0
228	G	C/T	T	G	C/T	C	T/C	A	C	C/T	G/C	G	C	C	G	2	1	1	1	2	1	2	1	2	1	2	2	0
229	G	C/T	T	C/G	C/T	C/T	T/C	A	C/G	C/T	C	T/G	C/T	A/C	G/A	1	0	0	1	0	1	0	0	2	0	1	0	0
230	G	T	C	C/G	T	C	T/C	A	C/G	C	G/C	G	C	A/C	G/A	2	1	1	1	0	2	1	1	0	0	1	1	0
231	G	T	C	C/G	C/T	C	T/C	A	G	C/T	G	G	C	A/C	G/A	1	1	1	1	0	2	0	2	0	1	1	1	2
232	G/A	C/T	C	C/G	C/T	C/T	T/C	A	C	C/T	G/C	G	C/T	A/C	G/A	0	1	1	2	2	1	2	1	2	0	2	2	0
233	G	T	C	C/G	T	C	T/C	A	G	C	G/C	T	C	A/C	G	0	1	2	1	0	0	2	0	0	2	1	1	0
234	G	C/T	C/T	G	C/T	C	T/C	A	C/G	C/T	G/C	T/G	C	A/C	G/A	0	2	2	2	1	0	1	0	1	1	0	0	0
235	G/A	C/T	T	C/G	T	C/T	T/C	A	C	C	G	T/G	C	A/C	A	0	1	1	2	1	1	2	1	1	1	2	2	1
236	G	C/T	C	C	T	C/T	C	A	C	C	G/C	T	C/T	A/C	A	2	2	1	1	0	0	1	2	0	0	1	2	0
237	G	C/T	C/T	C/G	T	C/T	T/C	A	C/G	C	G	G	C/T	A/C	G/A	0	1	2	2	0	0	2	2	2	2	0	1	2
238	G	C/T	C	C	C/T	C	T/C	A	C	C/T	G	T/G	C/T	A/C	G/A	0	2	2	0	0	0	2	2	1	1	1	2	0
239	G	T	C	C/G	C/T	C/T	T/C	A	C	C/T	G	G	T	A/C	G/A	0	1	1	1	0	0	2	1	0	2	1	2	1
240	G	C/T	C/T	C	C	C/T	C	A	C	C/T	G/C	G	C/T	A/C	G/A	1	0	1	2	1	0	2	2	0	2	1	1	1
241	G	C/T	C/T	C/G	C/T	C/T	C	G/A	C	C	G	G	C	A/C	G/A	2	1	1	1	0	2	1	2	0	1	1	0	0
242	G	T	C/T	C/G	C/T	C	T/C	A	C/G	C	G	T/G	C	A	G	0	0	0	1	1	1	2	0	1	2	1	1	0
243	G	C/T	T	C	C/T	C/T	T/C	A	C/G	C	G/C	T/G	C	A/C	G/A	1	0	1	1	0	0	1	1	2	0	2	0	0
244	G	C	T	C/G	C	C/T	T/C	A	C	C	G	T/G	C	A/C	G/A	0	0	1	0	2	1	2	0	2	1	1	1	0
245	G	T	C/T	C	C	C	T/C	A	C	C/T	G/C	T/G	C/T	A/C	G	1	0	2	2	2	0	0	0	2	0	1	2	0
246	G	C/T	C/T	C	C	C	C	A	C	C/T	C	G	C/T	A/C	A	0	0	1	2	0	1	1	1	0	1	1	0	0
247	G	C/T	C	C/G	C	C/T	T/C	A	C	C/T	G	G	C/T	A/C	G/A	0	0	1	0	0	1	2	1	2	0	2	2	2
248	G	C/T	C/T	C/G	T	C	T/C	A	C	C	G	G	C/T	A/C	G/A	1	2	1	2	1	0	0	1	0	0	0	0	0
249	G	C/T	C	G	C/T	C/T	T/C	A	C/G	C/T	G	G	C/T	C	G/A	0	1	1	1	1	1	2	2	1	0	1	1	0
250	G	C/T	C	C	C/T	C/T	T/C	A	C	C/T	G/C	T/G	C	A/C	G	1	0	1	1	2	1	1	1	0	1	1	0	0
251	G	C/T	C	C/G	C/T	C/T	T/C	A	C	C/T	G	T/G	T	A/C	A	0	0	2	2	0	1	2	1	1	0	1	1	2
252	G	C/T	C/T	C	C	C	C	A	C	C/T	G/C	G	C/T	C	G/A	0	1	1	1	1	1	1	2	2	0	1	1	0
253	G	C/T	C	C/G	T	C	T/C	A	C	C/T	G	T/G	C/T	A/C	G/A	0	2	2	2	0	1	2	2	2	0	2	1	1
254	G	T	C	C	C/T	C	T	A	C	C/T	G	T/G	C/T	A/C	G/A	0	1	1	1	2	0	2	1	0	0	1	1	0
255	G	T	C	G	T	C	T/C	A	C	C	G	T/G	C/T	A/C	G/A	0	1	1	1	1	0	2	2	1	2	0	1	0
256	G	C/T	C	C/G	C/T	C/T	C	A	C/G	C	G/C	G	C	A/C	G	0	1	1	1	0	1	2	1	1	0	1	1	0
257	G	T	C/T	C	C/T	C	C	A	C/G	C/T	G/C	G	C	C	A	0	1	1	1	1	1	1	1	1	1	2	1	0
258	G	C	C	C	C/T	T	C	A	C/G	C/T	G/C	T/G	C	A/C	A	0	0	1	1	2	1	2	1	0	2	1	1	0
259	G	T	C/T	C	C/T	C/T	C	A	C/G	C/T	G/C	G	C/T	C	G/A	1	1	1	2	0	2	1	1	1	1	1	1	0
260	G/A	T	C/T	C	T	C	C	G/A	C	C	G/C	G	C	C	A	1	1	1	1	0	2	2	1	1	0	1	1	0
261	G	C/T	C	C	T	T	C	A	C	C	G	T/G	C	C	A	0	1	1	1	0	1	0	1	2	0	1	0	0
262	G	C/T	C	C/G	C/T	C	T/C	A	C	C	G/C	G	C/T	C	G	0	1	1	1	1	1	1	0	2	2	1	0	0
263	G	C/T	C	G	C/T	C/T	T	A	C/G	C/T	G/C	T/G	C/T	A/C	G/A	0	0	1	1	2	0	2	0	1	2	1	1	0
264	G	T	C/T	C	T	C/T	C	A	C/G	C	G/C	G	C/T	A/C	G/A	0	1	1	1	2	1	2	1	1	1	1	1	0
265	G	C/T	T	C/G	T	C/T	T/C	A	C/G	C	G/C	T/G	C	A/C	G/A	1	1	0	1	1	1	1	1	2	0	2	1	0
266	G	C	C/T	G	T	C	T	A	C/G	C	G	T/G	C	C	G/A	0	1	1	1	0	0	2	1	1	1	1	1	1
267	G/A	T	C/T	G	C	C/T	T	G/A	G	C/T	C	T/G	T	A/C	G	0	2	2	1	1	1	2	1	1	1	1	1	0
268	G	C/T	C	C/G	T	C/T	T/C	A	C	C	G	G	C	C	A	1	0	0	1	1	1	1	2	1	0	1	1	0
269	G	T	C	G	C/T	C	T	A	C	C/T	G/C	G	C/T	C	G	0	1	2	1	1	1	2	1	1	0	1	1	0
270	G	C	T	C	C	C	C	A	G	C	G	T/G	C/T	A/C	A	0	1	1	1	1	1	2	2	1	1	1	1	0
271	G	T	C/T	C/G	T	T	T/C	A	C/G	C	G	T/G	C/T	A/C	A	0	2	2	2	1	1	0	1	2	2	2	0	0
272	G	C/T	C	C	T	C	T/C	A	C	C	G/C	G	C	C	A	0	1	1	1	2	1	2	2	1	1	1	1	0
273	G	C/T	C/T	C/G	T	C/T	T/C	G/A	C	C	G/C	T/G	C/T	C	G/A	1	0	1	1	0	1	1	1	0	0	1	0	0
274	G	C	T	C	C/T	C	T/C	A	C	C/T	G/C	G	C	A/C	G/A	0	0	1	1	0	0	2	1	1	1	0	0	0
275	G	C/T	C	C/G	T	C	T/C	A	C	C	G	G	C	C	G	0	1	1	1	1	1	2	1	1	0	1	1	0
276	G/A	C/T	T	G	C/T	C	T/C	G	C	C/T	G	T/G	C/T	A/C	A	1	1	1	1	2	1	2	2	2	1	1	2	1
277	G	C/T	C/T	G	C	T	T/C	A	C	C/T	G	T/G	C	A/C	A	0	1	1	1	0	1	2	2	1	1	1	1	0
278	G	C/T	T	C/G	C/T	C/T	T/C	A	C	C/T	G/C	G	C/T	C	A	1	1	1	1	1	0	1	2	2	1	1	0	0
279	G	C/T	C	C	T	C/T	C	A	C/G	C	G	T/G	C/T	C	G/A	0	1	2	1	1	0	2	1	1	2	0	0	0
280	G	C	C/T	C	C	C	C	A	C	C	G/C	G	C/T	C	A	0	0	1	1	0	0	2	1	1	0	1	2	0
281	G	C/T	C/T	C	C/T	C/T	T/C	G/A	C	C	G	T	C	A/C	G	0	1	1	1	1	0	2	1	1	1	1	1	0
282	G	C	C/T	C/G	C	C/T	C	A	C	C/T	C	T/G	T	C	A	0	1	2	2	1	1	1	1	1	1	1	1	0
283	G/A	T	T	C	C	C	C	A	C	C/T	G/C	T/G	C/T	A/C	G	0	1	2	2	0	1	2	1	2	2	1	0	0
284	G	C/T	C/T	C/G	T	C	T/C	A	C	C	G/C	T	C	A	A	0	1	1	1	2	1	1	1	1	2	1	1	0
285	G/A	C/T	C/T	C/G	C/T	C/T	T/C	A	C	C/T	G	T	C	C	G	1	1	2	2	0	1	1	1	1	0	1	1	0
286	G	C/T	C/T	C	C/T	C/T	C	A	C/G	C	G	T/G	C/T	A/C	G	0	0	1	1	1	0	2	2	2	2	1	1	1
287	G	C	T	C	T	C	T	A	C/G	C	G	T/G	C/T	C	G/A	0	0	0	1	1	1	1	1	1	0	1	1	0
288	G	C/T	C/T	C	T	C	C	A	C	C/T	G/C	G	C	C	G/A	1	1	1	2	0	1	0	1	1	1	1	1	0
289	G	C	C	C	T	C/T	C	A	C	C	G/C	T/G	C/T	A/C	G/A	1	0	1	2	2	1	2	2	2	0	1	1	0
290	G	C/T	C	C/G	C	C/T	T/C	A	C	C/T	C	G	T	C	G	0	0	2	1	0	0	1	2	0	0	1	0	0
291	G	C	C	C/G	C/T	C/T	T/C	A	C	C	G	G	C	C	A	1	0	1	2	2	0	2	0	1	1	2	1	1
292	G	C	C/T	C	C/T	C/T	T/C	A	C	C/T	C	G	C	C	G/A	0	1	0	2	0	1	1	1	2	2	1	1	0
293	G	C/T	C/T	C	T	C/T	T/C	A	C/G	C	G	G	C/T	C	G/A	0	0	1	1	2	1	1	0	1	0	1	1	0
294	G	C/T	T	C	C/T	C/T	T/C	A	C	C/T	G	G	C/T	C	G	0	0	2	2	0	1	1	2	1	0	0	1	0
295	G	C/T	C	C/G	T	C/T	C	A	C	C/T	G/C	T/G	C	C	A	1	0	2	1	1	0	1	1	0	0	0	1	0
296	G	C/T	C/T	C/G	T	C/T	T/C	A	C	C	G	G	C	C	G	2	1	0	1	1	1	1	1	0	0	1	1	0
297	G	T	T	C	C/T	T	C	A	C	C	G/C	T/G	C	A/C	G/A	1	0	1	1	1	0	2	1	1	0	1	1	1
298	G	T	C	C	C/T	C/T	C	A	C	T	G	G	C/T	C	G	0	0	0	2	2	1	1	0	2	2	1	0	0
299	G	C/T	C/T	C/G	T	C/T	C	A	C	C	G	G	C/T	C	G	0	1	1	1	2	1	1	1	1	0	1	1	0
300	G/A	T	C/T	G	T	C/T	T/C	G/A	C	C	G	T	C	A	G	2	1	1	2	2	1	1	1	1	2	1	2	0
301	G	C/T	C/T	C/G	C/T	C/T	C	A	C	C	G	T/G	T	A	G	0	0	2	1	0	0	2	0	2	2	1	2	0
302	G/A	C	C	C	C	C	C	G/A	C	C/T	G/C	G	C	C	G/A	2	0	1	1	0	2	0	1	0	1	1	1	0
303	G/A	C/T	C	C/G	C/T	C/T	T/C	G/A	C	C/T	G/C	G	C/T	C	G	1	2	2	1	0	1	2	1	0	2	1	1	0
304	G	C/T	C/T	C/G	C	C/T	C	A	C/G	T	G/C	G	C	C	G/A	1	0	1	1	1	1	1	1	0	0	1	1	0
305	G	C/T	C/T	C/G	C	C	T	A	C	T	G/C	T/G	C/T	A/C	G	1	0	1	1	1	0	2	1	1	1	1	1	0
306	G	C	C	C/G	C	C/T	T/C	A	C/G	T	G/C	T/G	C	A/C	G	2	1	0	1	2	1	2	1	2	1	1	2	0
307	G	C/T	T	C/G	C/T	C/T	T/C	A	C/G	C/T	G/C	G	C/T	C	G	0	1	2	2	1	1	2	1	2	2	1	1	0
308	G	C/T	C/T	C	C	C/T	C	A	C	C/T	G	T/G	C/T	A/C	G/A	0	2	1	2	1	1	2	1	1	1	1	1	0
309	G	C/T	C/T	C/G	C/T	C	T/C	A	C	C	C	G	C/T	C	G	1	2	2	2	0	0	2	1	0	1	1	1	0
310	G	C/T	C	C/G	C/T	C	T/C	A	C	C/T	G/C	T	C/T	A/C	G/A	0	1	1	1	2	1	1	2	2	0	2	0	1
311	G	T	C/T	G	C/T	C/T	T	A	C	C	G	T/G	C/T	C	G	0	1	2	2	2	0	2	2	2	1	1	1	0
312	G	C/T	C/T	C/G	C	C/T	T/C	A	C	C/T	G	T/G	T	C	G/A	1	2	1	2	2	1	2	1	0	0	2	1	0
313	G	T	C	G	C/T	C/T	C	G/A	C	C	G	G	C	C	G	2	2	2	2	2	1	2	2	2	1	2	0	0
314	G	T	C/T	C/G	T	C/T	T/C	A	C/G	C	G/C	T/G	C	A/C	G/A	0	2	0	2	0	2	1	0	0	0	1	2	0
315	G	C/T	C	C	C	C	C	A	C/G	C	G	T/G	C/T	A/C	G	0	2	1	2	2	1	2	0	0	0	1	0	0
316	G	C	C	C/G	C	C	T/C	A	C	T	G	T/G	C	A/C	A	2	2	1	0	2	1	2	0	1	1	1	2	0
317	G	C/T	T	C	C	C	C	A	C/G	C/T	G	G	C/T	C	G	2	1	0	1	0	2	1	2	1	0	1	1	0
318	G	C	T	C/G	C	C	T	A	C	C/T	G	T	C	A/C	G/A	1	1	1	2	1	1	2	2	0	1	0	0	0
319	G	C/T	C/T	C	T	C	T/C	A	C	C	G/C	T/G	C	A/C	G/A	1	2	0	2	0	1	2	1	0	0	0	1	0
320	G	C	C/T	C	C/T	C	T	A	C	C	G	T	C	A/C	A	1	1	0	2	0	1	2	2	1	0	1	1	0
321	G	T	C	C/G	C/T	C	T/C	G/A	C	C/T	G	T/G	C/T	A/C	G/A	0	0	2	2	2	1	2	1	2	0	1	0	0
322	G	T	C	C/G	C	C	T/C	A	C	C/T	G	T/G	T	A/C	A	0	2	2	1	2	1	2	0	1	2	1	2	0
323	G	C/T	C/T	C/G	T	C/T	T/C	A	C/G	C	G/C	G	C	C	G	2	2	1	2	2	1	1	1	1	0	2	1	1
324	G	C	C/T	C	C/T	C/T	T/C	A	C/G	C/T	G	G	C/T	C	A	1	2	2	2	0	1	1	1	1	1	1	1	0
325	G	C	C/T	C	C/T	T	T/C	A	C	C/T	G/C	G	C	C	G/A	0	2	1	2	2	1	2	2	2	2	1	0	0
326	G	C	T	C/G	C	T	T/C	A	C/G	C/T	G	T	C	A/C	G	0	0	1	2	1	1	2	1	2	0	2	1	1
327	G	C/T	C	C/G	C/T	C	C	A	C	C/T	G/C	T/G	C	A/C	G/A	1	2	2	1	1	1	2	0	1	1	1	1	0
328	G	C/T	C/T	C	C	C/T	C	A	C/G	T	G	T	C	A/C	G	0	0	1	2	1	1	2	0	1	1	1	2	0
329	G/A	C	C/T	C/G	T	C/T	T/C	A	G	C	G/C	G	T	C	G/A	2	1	1	1	0	1	1	1	0	0	1	1	0
330	G	C/T	C/T	G	C/T	C	T	A	C/G	C/T	G	T/G	C	C	A	1	1	1	1	2	1	2	1	1	0	2	1	0
331	G/A	C/T	C/T	G	C/T	C/T	T	A	C/G	C/T	G/C	G	C/T	C	A	1	1	1	1	2	1	2	2	2	0	2	1	0
332	G	C/T	C/T	C/G	C	T	T/C	A	C	C/T	G/C	T/G	C	A/C	G/A	1	1	2	2	1	1	2	0	0	0	1	0	0
333	G	C/T	C	C/G	C/T	T	T/C	A	C	C/T	G/C	G	C	C	A	0	1	1	2	0	1	2	2	0	1	1	0	0
334	G	C/T	C/T	C	C/T	C/T	C	A	C/G	C	G/C	G	C	C	G	0	1	1	1	1	1	2	2	2	0	1	1	0
335	G	C/T	C	C	C/T	C	C	A	C	C/T	G/C	G	C	C	G	1	1	1	2	2	1	2	1	2	1	1	2	1
336	G	C/T	C/T	C	T	T	C	A	C	C	G/C	T/G	C	A/C	A	1	1	1	1	0	2	1	0	0	2	0	1	0
337	G	C/T	C/T	C/G	T	C/T	T/C	G/A	C	C	G/C	T/G	C	A/C	G/A	1	0	1	2	0	1	2	1	2	2	1	1	0
338	G/A	T	C/T	C/G	C	C	T	G/A	C	T	G	T/G	C	C	G	2	0	1	2	2	0	0	1	1	0	2	1	0
339	G/A	C	C	C	C/T	T	C	A	C	C/T	G	G	C/T	C	G	0	0	1	1	1	0	2	0	2	2	0	2	1
340	G/A	T	C	C/G	C	C/T	T/C	G/A	C	T	G	T/G	C	C	G	1	2	1	2	1	1	2	1	0	0	2	1	0
341	G	T	C/T	C/G	C/T	C/T	C	A	C/G	C	G/C	T/G	C	A/C	G/A	1	0	1	1	2	0	2	1	1	0	1	1	0
342	G	T	T	C/G	C/T	T	T/C	A	C/G	C/T	G/C	G	C/T	C	G/A	1	1	2	2	0	0	1	0	1	1	0	1	0
343	G	T	C/T	C	C/T	C/T	C	A	C/G	C/T	G/C	G	C/T	C	G/A	0	2	1	1	2	1	2	0	0	0	1	0	0
344	G	C/T	C/T	C/G	C/T	C	T	A	C	C/T	G	T/G	T	A/C	G/A	1	2	2	1	1	0	2	0	0	0	1	0	0
345	G	C/T	T	G	C/T	C/T	T	A	C	C/T	G	T/G	C/T	A/C	G/A	0	1	2	1	2	0	2	1	0	0	0	0	0
346	G	C/T	C/T	C	C	C	C	A	C	C/T	G	G	C/T	C	G/A	0	1	1	1	0	2	1	1	2	1	1	2	0
347	G	C/T	C	G	C/T	C	T	A	C	C	G/C	T/G	C/T	A/C	G/A	1	2	1	2	1	1	2	0	1	0	1	0	0
348	G	C/T	C/T	C/G	C/T	C	T/C	A	C	C	G/C	G	T	C	A	1	2	1	0	0	2	2	1	1	1	1	1	0
349	G	C/T	C	C/G	C/T	C/T	T/C	A	C	C/T	G	T	C	A	A	2	0	2	2	1	1	1	0	1	1	1	1	0
350	G	T	C/T	C/G	C/T	C	C	A	C	C	G/C	G	C	C	A	1	0	2	2	0	1	2	1	1	0	1	0	0
351	G	C/T	C	C	C	C/T	C	A	C	C/T	G	T/G	C	A/C	A	1	2	1	1	2	2	2	1	1	2	1	0	0
352	G	C	C/T	C/G	C	T	T/C	A	C/G	C/T	G/C	T/G	C	C	G/A	2	2	0	2	2	1	1	1	2	1	1	1	0
353	G	C/T	C/T	C/G	C	C/T	T/C	A	C/G	C/T	G/C	T/G	C	C	G/A	2	0	0	2	1	1	2	2	2	1	1	0	1
354	G	C/T	C	C/G	C/T	C/T	T/C	G/A	C	C/T	G	T	C/T	A/C	A	0	1	2	2	2	1	2	1	0	0	1	0	0
355	G	C/T	C/T	C/G	T	C/T	T/C	G/A	C	C	G	T/G	C/T	A/C	G/A	0	1	1	2	1	1	2	0	1	2	1	0	0
356	G	C/T	C/T	C	C/T	C	C	G/A	C/G	C	G	G	C	C	G/A	1	2	1	2	2	0	2	2	0	0	1	1	1
357	G	C/T	C/T	C/G	C/T	C	T	A	C/G	C	G	G	C	C	A	0	2	1	2	2	0	2	1	2	1	1	1	0
358	G	C/T	C/T	C	C	C	T/C	G/A	C	C	G	G	C	C	G/A	0	1	1	2	2	0	2	2	1	2	0	0	0
359	G	T	C	C	C	C/T	C	A	C	C/T	G/C	T/G	C	A/C	G/A	1	0	0	2	2	1	2	2	2	0	1	1	0
360	G	C/T	C	C/G	C/T	C	T/C	A	C/G	C/T	G	T/G	C/T	A/C	G/A	2	1	1	2	1	1	2	1	2	0	0	1	0
361	G	C/T	C/T	C	C/T	C	C	A	C	C/T	G	G	C	A/C	G	2	2	1	1	1	1	1	0	1	0	1	1	0
362	G	T	C/T	C	C/T	C/T	C	A	C	C	G	G	C	C	G/A	2	1	0	1	2	1	1	0	0	1	2	0	0
363	G	C/T	C/T	C	C/T	C	C	A	C/G	C/T	G/C	G	C/T	C	G	1	1	1	2	1	1	2	2	2	2	0	1	0
364	G	T	C/T	C/G	T	C	C	A	C/G	C	G/C	G	C/T	C	G/A	0	2	1	2	1	1	1	0	1	2	1	1	1
365	G	C	C	C/G	C	C	T/C	A	C/G	C/T	G	T	C	A/C	A	2	0	2	0	0	2	1	2	1	0	1	1	0
366	G	T	C	C/G	C/T	C	T/C	A	C	C	G	T	T	A/C	G/A	1	1	1	2	0	2	2	0	0	0	2	0	0
367	G	C/T	C	C/G	C/T	C	T/C	A	C	C	G	T	C/T	A/C	G/A	1	1	1	1	0	0	2	1	0	0	2	1	0
368	G/A	T	C	G	C/T	C	T	G/A	C	C/T	G/C	G	C	A/C	A	2	2	0	2	0	2	1	2	0	1	2	2	0
369	G	T	C/T	C/G	C/T	T	C	A	C/G	C	G/C	T/G	C/T	C	A	0	1	1	2	1	1	1	1	1	1	1	0	0
370	G	T	C/T	G	C/T	C/T	T/C	A	C/G	C/T	C	G	C/T	C	A	0	2	1	1	1	1	2	1	1	2	2	0	0
371	G	T	C/T	C/G	C/T	C/T	T/C	A	C	C/T	G	G	C/T	C	G/A	0	0	1	2	0	0	1	1	2	1	2	1	1
372	G	C/T	C/T	C	T	C	T/C	A	C	C	G	G	C	C	G/A	2	0	1	1	0	0	1	1	1	2	2	2	0
373	G/A	C/T	C	C	C/T	C/T	C	G/A	C	C	G/C	G	C/T	C	G/A	1	2	0	2	2	0	1	1	1	0	1	0	0
374	G	T	C/T	C/G	C/T	C/T	C	A	C/G	T	G/C	G	C	C	G/A	2	0	1	2	2	0	2	0	2	0	0	0	0
375	G/A	C/T	C/T	C	C/T	T	C	G/A	C	C/T	G	G	C	C	A	1	1	0	2	2	1	1	1	1	2	1	2	0
376	G	C	T	C	C/T	C	T/C	A	C	C/T	G/C	T	C/T	C	G/A	1	1	1	2	1	1	0	1	1	0	1	1	0
377	G	C/T	C/T	C	C/T	C	C	A	C	C/T	G	T	C	C	A	1	1	1	2	2	0	1	0	1	2	1	0	0
378	G	C/T	C/T	C/G	C/T	C/T	T/C	A	C	C/T	G/C	T/G	C	A/C	A	2	1	1	1	2	1	1	1	1	1	1	2	0
379	G	C/T	C/T	C	C/T	C/T	T/C	A	C/G	C/T	G/C	T/G	C	C	G/A	1	1	2	0	0	1	1	2	2	2	1	1	0
380	G	C/T	T	C	C/T	C/T	T	A	C	C/T	G	G	C	C	A	0	1	1	1	1	0	1	1	0	0	1	1	2
381	G	T	C/T	C/G	T	C	T/C	A	C	C	G/C	T/G	C	A/C	G/A	0	0	1	2	2	1	1	1	1	0	2	1	1
382	G	T	C/T	C/G	T	C/T	T/C	A	C	C	G	T/G	C	A/C	G/A	0	1	1	1	2	1	0	2	2	0	2	0	0
383	G	T	C	C/G	T	C	T/C	A	C/G	C	G	T/G	C/T	A/C	G/A	1	2	1	1	1	0	2	0	1	0	1	1	0
384	G	T	C/T	C/G	C/T	C	T/C	A	C/G	C	G	T/G	C/T	A/C	A	0	2	1	1	1	0	2	1	1	0	1	2	0
385	G	T	C	C	T	C	C	A	C	C/T	G/C	G	C/T	A/C	G/A	1	0	0	2	1	1	1	0	1	1	1	1	0
386	G	C/T	C/T	C	T	C	T/C	A	C	C	G	T/G	C	A/C	G/A	1	0	2	2	0	1	1	1	2	1	1	0	2
387	G	C/T	C	C	T	C	T/C	A	C	C/T	G/C	G	C	A/C	A	0	2	1	1	2	0	2	2	2	1	0	2	0
388	G	C/T	C/T	C/G	C/T	T	T/C	A	C	C/T	G	T/G	C	A/C	G/A	1	0	1	2	2	0	1	2	2	2	0	1	0
389	G	T	C/T	C/G	C/T	T	T/C	A	C	C/T	G	T/G	C	A/C	G/A	1	1	1	1	0	1	2	2	0	1	1	0	0
390	G	C/T	C	C/G	T	C/T	T/C	A	C	C	G	T	C/T	C	G	2	1	1	1	1	0	0	1	1	0	1	1	0
391	G	C/T	C/T	C/G	T	C/T	T/C	G/A	C	C/T	G/C	T/G	C	A/C	G/A	2	0	0	2	0	0	1	2	1	2	1	0	0
392	G	T	C	C/G	T	C/T	T/C	A	G	C	G/C	T/G	C/T	A/C	A	1	0	1	1	1	1	2	2	2	1	1	2	0
393	G	C/T	C/T	C	T	C	C	A	C	C	G	T	C	A	G	1	1	1	1	1	1	2	2	2	0	1	2	0
394	G	C/T	C	C	T	C/T	C	A	C/G	C	G/C	T/G	C/T	A/C	G/A	0	2	1	0	1	2	2	1	1	0	1	1	0
395	G	C/T	C/T	G	C/T	C/T	T/C	A	C/G	C	G	T/G	C/T	A/C	A	0	1	1	2	2	2	2	2	0	2	1	1	0
396	G	C/T	C	C	C	C	T/C	A	C	T	G	T/G	C/T	A/C	G	2	0	1	1	0	1	2	0	0	1	1	0	0
397	G	C/T	C	C/G	C	C/T	T/C	A	C/G	C/T	G	T/G	C/T	A/C	G/A	2	1	1	0	1	1	1	1	0	0	2	0	0
398	G	T	C	G	C	C	T/C	A	C	C/T	G/C	T/G	C	A/C	G	0	2	2	0	1	1	1	0	1	1	1	0	0
399	G	C/T	C/T	C/G	C/T	C	T/C	G/A	C	C/T	G	T/G	C	A/C	G/A	1	2	1	2	2	1	2	1	1	1	1	1	0
400	G	T	C/T	C/G	C/T	C	T/C	A	C	C	G/C	T/G	C	A/C	A	0	0	1	1	2	0	2	2	1	2	1	0	0
401	G	T	C/T	G	C	C	C	A	C	C/T	G/C	G	C	C	G/A	0	2	2	1	1	1	2	1	1	1	1	1	0
402	G	T	C/T	C/G	C/T	C	C	A	C	C/T	G	T/G	C	C	G	1	0	1	2	0	2	1	1	1	0	0	1	2
403	G/A	C/T	C/T	G	C/T	C/T	T/C	A	C	C	G/C	T	C	A/C	G/A	1	2	2	2	0	2	2	2	1	0	1	1	0
404	G	C/T	C/T	C/G	C/T	C/T	T/C	G/A	C	C	G	T/G	C	C	G	2	0	1	2	0	2	1	1	1	0	0	2	0
405	G	C/T	C/T	C/G	C/T	C/T	T/C	A	C	C	G/C	T/G	C	A/C	G/A	0	2	1	2	2	1	1	1	2	1	1	2	0
406	G	C/T	C/T	C/G	T	T	T/C	G/A	C	C	G/C	T/G	C	A/C	G/A	1	1	1	2	2	1	1	1	2	1	2	1	0
407	G	C/T	C	C/G	T	C	T/C	A	C	C	G	T/G	C	A/C	G/A	2	2	1	1	1	2	2	1	0	0	1	1	0
408	G	C/T	C/T	C/G	C/T	C/T	T/C	A	C	C/T	G	T/G	C	A/C	A	2	1	1	1	0	1	1	0	1	2	1	0	0
409	G	C/T	C	C	T	T	C	A	C	C	G	T/G	C	A/C	G/A	1	0	1	2	2	1	1	0	2	1	1	1	0
410	G	C/T	C/T	C	C/T	C/T	C	G/A	C	C/T	G	T/G	C	A/C	A	2	0	2	1	2	1	2	1	1	2	1	1	0
411	G	C/T	C/T	C/G	C/T	C/T	T/C	A	C	C/T	G/C	T/G	C	A/C	G/A	2	0	1	2	0	1	2	1	0	0	0	1	0
412	G	C/T	C/T	C/G	T	C/T	T/C	A	C	C	G/C	T/G	C	A/C	G/A	0	0	2	2	1	1	1	1	0	1	2	0	0
413	G	C/T	C/T	C/G	C/T	C/T	T/C	A	C	C/T	G	T/G	C	A/C	A	2	0	1	2	0	1	2	1	1	0	2	1	0
414	G	C/T	C/T	C	C/T	C/T	C	A	C	T	G	T/G	C	A/C	A	0	2	1	2	1	1	2	0	1	1	0	1	2
415	G	C/T	C/T	C/G	C/T	C/T	T/C	A	C	C/T	G/C	T/G	C	A/C	G/A	0	0	2	2	1	0	2	0	1	0	0	0	0
416	G	C/T	C/T	C/G	C/T	C	T/C	A	C	C/T	G/C	T/G	C/T	A/C	A	1	2	2	2	2	1	2	1	1	0	2	0	0
417	G	C/T	C/T	C/G	C/T	T	T/C	A	C	C/T	G/C	T/G	C	A/C	G/A	1	1	1	2	2	1	1	1	0	0	1	1	0
418	G	C/T	C/T	C/G	C/T	C/T	T/C	A	C	C/T	G/C	T/G	C	A/C	G/A	1	2	1	1	2	1	2	2	2	1	2	1	0
419	G	C/T	T	C/G	C/T	T	T/C	A	C	C	G	T/G	C	A/C	G/A	0	2	1	2	1	1	1	0	2	0	1	1	0
420	G	T	T	G	C/T	T	T/C	G/A	C	C	G	G	C	A/C	G/A	0	0	0	2	1	1	1	1	1	0	1	2	0
421	G	C/T	C/T	C	T	C	T/C	A	C	C	C	T/G	C/T	A/C	G/A	2	1	0	2	0	0	1	1	0	0	1	0	0
422	G	C/T	C/T	C/G	C/T	C	T/C	A	C	C	G/C	T/G	C/T	A/C	G/A	2	2	1	2	2	1	2	1	1	1	1	2	0
423	G	C/T	C/T	C/G	T	C/T	T/C	A	C/G	C	G/C	T/G	C/T	A	A	2	1	1	1	1	1	2	0	2	2	1	1	0
424	G	C/T	C/T	C	C/T	C/T	T/C	A	C	C/T	G	T/G	C/T	A/C	G/A	2	1	1	1	0	2	2	1	2	0	1	1	1
425	G	C/T	C/T	C	C/T	C	T/C	A	C	C	G/C	T/G	C/T	A/C	A	2	0	2	2	1	0	1	1	0	0	1	0	0
426	G/A	C/T	C/T	C/G	T	C	T/C	A	C	C	G	T/G	C	A/C	A	0	1	2	1	1	1	2	2	2	0	0	0	0
427	G	C/T	C/T	C/G	C/T	C	T/C	A	C	C	G/C	T/G	C	A/C	A	2	0	2	2	2	0	2	1	1	1	1	1	0
428	G/A	C/T	C/T	C/G	C	C	T/C	A	C	C/T	G/C	T/G	C	A/C	G/A	2	0	1	1	1	1	1	2	0	0	2	2	0
429	G	T	C	C	C	T	C	A	C	T	G	T	C/T	A	G/A	0	2	2	2	1	0	2	0	1	2	1	0	0
430	G	C/T	C	C/G	C	C/T	T/C	A	C	T	G/C	T	C	A/C	G/A	0	2	1	1	0	1	2	2	2	1	1	2	0
431	G	C/T	C/T	C/G	C/T	C/T	T/C	A	C	T	G	T/G	C/T	A/C	G/A	2	0	1	2	2	1	1	1	1	0	1	2	0
432	G	C/T	C/T	C/G	C/T	C/T	T/C	A	C	C/T	G	T/G	C	A/C	G/A	1	1	1	1	2	1	2	2	1	2	1	0	2
433	G	T	T	C	C/T	C/T	C	A	C	C	G	T/G	C/T	A/C	G/A	2	0	1	2	1	1	1	2	0	1	0	0	1
434	G	T	C	C/G	T	C	T/C	A	C/G	C	G/C	T/G	C	A/C	G/A	0	1	1	0	0	1	1	2	1	0	1	1	1
435	G	T	C/T	C	C/T	C	C	A	C	C	G	T/G	C/T	A/C	G/A	2	1	0	1	0	2	1	1	0	1	1	0	0
436	G	T	C/T	C/G	C/T	C/T	T	A	C	C	G/C	G	C/T	A/C	G/A	2	0	0	1	2	0	1	1	0	0	1	0	0
437	G	C/T	C/T	C	T	T	C	A	C	C	G	T	C	A/C	G/A	2	0	2	2	2	1	1	0	1	1	1	1	1
438	G	T	C/T	C	C/T	C/T	T/C	A	C	C	G/C	T/G	C/T	A/C	G/A	0	2	1	2	2	1	2	0	1	0	1	1	1
439	G/A	C/T	C/T	C/G	T	C/T	C	G/A	C/G	C	G	T/G	C	A/C	G/A	2	0	2	2	1	1	1	1	1	1	1	0	0
440	G	C/T	C	C	C	C	C	A	C/G	T	G/C	T/G	C/T	A/C	A	2	0	0	2	0	0	1	1	0	0	1	0	0
441	G	C/T	C/T	C/G	C/T	C	T/C	A	C	C/T	G/C	T/G	C	A/C	G/A	2	2	1	2	0	0	2	1	2	1	1	0	0
442	G	C/T	C/T	C/G	C/T	C/T	T/C	A	C	C/T	G	T/G	C	A/C	G/A	1	1	2	2	1	1	1	1	2	2	1	1	0
443	G	C/T	C/T	C/G	C/T	C	T/C	A	C	C/T	G	T/G	C	A/C	G/A	0	0	2	2	1	1	2	1	2	1	1	0	1
444	G	C/T	C	C/G	C/T	C	T/C	A	C	C	G	T/G	C	A/C	G/A	1	1	1	2	2	1	2	1	1	1	1	2	0
445	G	C/T	C/T	C/G	T	C	T/C	A	C	C	G/C	T/G	C	A/C	G/A	0	1	1	2	1	1	1	1	1	1	1	0	0
446	G	C/T	C/T	C	C/T	C	T/C	A	C	C/T	G/C	T/G	C	A/C	G/A	2	0	1	2	0	2	1	2	1	1	1	0	0
447	G	C/T	C/T	C	T	C/T	C	A	C	C	G	T/G	C/T	A/C	G/A	1	0	1	1	2	1	2	1	1	0	2	1	0
448	G	C/T	C/T	C/G	T	C/T	T/C	A	C	C	G/C	T/G	C	A/C	G/A	2	1	2	1	2	1	2	2	2	2	1	1	0
449	G	C/T	C/T	C/G	T	T	T/C	A	C	C	G	T/G	C	A/C	A	0	0	2	1	0	1	2	1	1	2	1	1	0
450	G	C/T	C/T	C/G	T	C/T	T/C	A	C	C	G	T/G	C	A/C	A	1	1	1	2	2	1	2	2	2	1	1	1	2
451	G	C/T	C/T	C	C/T	C/T	C	A	C	C/T	G/C	T/G	C	A/C	A	2	0	1	2	1	1	1	2	2	0	2	1	1
452	G	C/T	C	C/G	C/T	C	T/C	A	C/G	C/T	G	T/G	C	A/C	G/A	0	1	2	1	1	1	1	0	2	0	0	1	0
453	G	C/T	C/T	C/G	C/T	C	T/C	A	C	C/T	G	T/G	C	A/C	G/A	1	2	1	1	0	0	2	2	2	1	2	2	0
454	G	C/T	C/T	C/G	T	C	T/C	G/A	C	C	G	T/G	C	A/C	A	0	0	1	2	0	1	1	0	2	1	1	2	0
455	G	T	C	C	T	C/T	C	A	C	C	G	T/G	C	A/C	A	0	1	1	2	0	1	2	0	0	0	1	0	1
456	G	C/T	C/T	C/G	C/T	T	T/C	A	C	C	G	T/G	C	A/C	G/A	2	0	1	2	1	1	2	1	2	1	1	0	0
457	G	C/T	C/T	C/G	C/T	C/T	C	A	C	C/T	G/C	T/G	C	A/C	G/A	1	2	0	1	2	1	2	1	0	2	2	2	1
458	G/A	C/T	C/T	C	C/T	C/T	T/C	G/A	C	C/T	G	T/G	C	A/C	A	0	0	1	2	1	1	2	2	1	2	2	2	0
459	G	C/T	C/T	C/G	C/T	C/T	T/C	G/A	C	C/T	G/C	T/G	C	A/C	A	2	2	1	2	2	1	2	2	1	1	1	0	0
460	G	C/T	T	C/G	C/T	C/T	T/C	A	C	C	G	T/G	C/T	A/C	G/A	1	0	2	2	0	2	1	1	1	0	1	1	1
461	G	C/T	C/T	C/G	C/T	C/T	T/C	A	C	C/T	G	T/G	C/T	A/C	G/A	2	1	1	2	0	1	1	2	1	0	1	1	0
462	G	C/T	T	C/G	T	C/T	T/C	G/A	C	C/T	G/C	T/G	C	A/C	G/A	1	2	1	0	0	2	2	0	2	1	0	0	0
463	G	C/T	C/T	C/G	T	C/T	T/C	A	C	C	G/C	T/G	C	A/C	G/A	1	0	2	0	1	1	1	1	0	0	1	1	0
464	G	C/T	C/T	C/G	T	C	T/C	A	C	C	G/C	T/G	C	A/C	G/A	1	1	1	1	0	0	2	0	1	1	1	0	0
465	G	C/T	C/T	C/G	T	C	T/C	A	C	C/T	G	T/G	C	A/C	G/A	2	0	1	2	2	1	2	1	0	0	1	1	0
466	G	C/T	C/T	C/G	C/T	C/T	T/C	A	C	C/T	G/C	T/G	C	A/C	G/A		2	0	2	2	1	2	1	2	0	1	2	0
467	G	C/T	C	C/G	T	C	T	A	C	C	G/C	T/G	C/T	A/C	G/A	0	0	2	2	1	1	1	0	1	1	1	2	0
468	G	C/T	C	C/G	T	C	T/C	A	C	C	G/C	T/G	C/T	A/C	G/A	2	1	1	1	0	1	2	2	1	0	2	1	0
469	G	C/T	C	C/G	C/T	C	T/C	A	C	C/T	G/C	T/G	C/T	A/C	G/A	1	0	2	2	2	0	1	1	2	2	1	0	0
470	G	C/T	C/T	C	C/T	C	T/C	A	C	C/T	G/C	T/G	C/T	A/C	G/A	0	2	1	2	1	1	2	0	1	0	1	1	0
471	G	C/T	C/T	C/G	C/T	C/T	T/C	A	C	C	G	T/G	C	A/C	A	0	0	2	2	1	0	2	2	2	0	1	1	0
472	G	C/T	C/T	C/G	C/T	C/T	C	A	C	C	G/C	T/G	C	A/C	A	2	1	1	1	0	0	2	2	1	0	1	1	0
473	G	C/T	C/T	C/G	C/T	T	T/C	A	C	C	G/C	T	C	A/C	G/A	0	0	2	2	1	1	2	1	1	0	1	0	0
474	G	C/T	C/T	C	C	C	C	A	C/G	T	G	T/G	C/T	A/C	G/A	2	0	2	2	2	1	2	2	2	0	0	1	0
475	G	C/T	C/T	C/G	C/T	C/T	T/C	A	C	C/T	G	T/G	C	A/C	G/A	1	1	2	2	2	1	2	1	1	0	1	2	0
476	G	C/T	C/T	C	T	C	T/C	G/A	C/G	C	G/C	T/G	C	A/C	G/A	2	0	2	2	0	0	1	2	0	2	1	1	0
477	G	C/T	C/T	C	T	C	C	G/A	C/G	C	G/C	T/G	C	A/C	G/A	0	2	2	2	1	1	1	0	0	2	1	0	0
478	G	C/T	C	C/G	T	C	T/C	A	C	C	G/C	T/G	C	A/C	A	2	1	1	1	0	1	2	1	0	0	1	1	1
479	G	C/T	C/T	C/G	C/T	C/T	T/C	A	C	C/T	G	T/G	C	A/C	G/A	0	0	1	2	0	1	2	1	0	0	1	0	0
480	G	C/T	C/T	C	C/T	C/T	T/C	A	C	C/T	G	T/G	C/T	A/C	A	0	2	1	2	1	1	2	0	1	2	2	2	0
481	G	C/T	C/T	C/G	T	C/T	T/C	A	C	C/T	G	T/G	C	A/C	G/A	0	1	1	2	0	2	2	2	0	2	1	0	0
482	G	C/T	C	C/G	C/T	T	T/C	A	C	C/T	G/C	T/G	C	A/C	G/A	1	2	1	1	0	1	2	2	2	0	2	1	0
483	G	C/T	C/T	C/G	T	C	T/C	A	C	C/T	G	T/G	C/T	A/C	G/A	1	0	2	1	1	1	1	0	1	1	1	1	0
484	G	C/T	C/T	C/G	T	C/T	T/C	A	C	C	G	T/G	C/T	A/C	G/A	1	2	2	2	0	1	1	0	1	1	2	0	0
485	G	C/T	C/T	C/G	C/T	C	T/C	G/A	C/G	C	G	T/G	C/T	A/C	G/A	2	2	0	1	2	1	0	0	1	0	2	0	0
486	G	C/T	C/T	C/G	C/T	C/T	T/C	G/A	C	C/T	G/C	T/G	C	A/C	G/A	1	1	1	1	0	1	1	0	1	2	2	1	0
487	G	C/T	C/T	C/G	C/T	C/T	T/C	G/A	C	T	G/C	T/G	C	A/C	G/A	2	2	0	1	0	2	2	1	0	1	1	0	0
488	G	C/T	C/T	C	C/T	C/T	T/C	G/A	C	C/T	G	T/G	C/T	A/C	G/A	2	1	1	2	1	1	1	0	1	0	1	0	0
489	G	C/T	C/T	C/G	C/T	C/T	T/C	A	C/G	C/T	G/C	T/G	C	A/C	G/A	2	2	2	1	1	1	2	1	0	2	1	1	0
490	G	C/T	C/T	C/G	T	C/T	T/C	A	C	C	G/C	T/G	C	A/C	A	2	1	1	1	2	1	2	2	1	0	2	0	0
491	G	T	C	C	C/T	C/T	T/C	G/A	C	C/T	G/C	T/G	C	A/C	G/A	2	1	2	2	2	1	1	1	2	1	1	1	1
492	G	C/T	C/T	C	C/T	C/T	T/C	A	C	C/T	G/C	G	C	A/C	G/A	0	2	0	1	2	2	1	2	2	0	1	1	0
493	G/A	T	C/T	C/G	C/T	C	T/C	G/A	C	C	G	T/G	C/T	A/C	A	2	1	0	1	0	1	1	1	0	1	2	0	0
494	G	T	C	C/G	C/T	C	T/C	A	C/G	C/T	G/C	T/G	C	A/C	A	1	1	2	1	0	1	2	1	1	2	1	1	2
495	G	T	C	G	C	C	T	A	C/G	C/T	G/C	T/G	C	A/C	A	0	1	1	1	0	0	2	1	1	1	2	2	0
496	G	C/T	C/T	C	C/T	C/T	T/C	A	C	C	G	T/G	C	A/C	A	1	1	1	2	1	2	2	1	2	1	1	0	0
497	G	C/T	C/T	C/G	C/T	C/T	T/C	A	C	C	G	T/G	C	A/C	G/A	1	2	1	1	2	1	2	0	1	1	1	2	0
498	G	C/T	C/T	C/G	C/T	C/T	T/C	A	C	C/T	G/C	T/G	C	A/C	G/A	0	2	1	1	2	1	2	2	1	2	1	0	0
499	G	C/T	T	C/G	C/T	C/T	T/C	A	C/G	C	G/C	T/G	C	A/C	G/A	0	1	1	1	2	1	2	1	0	2	1	2	0
500	G	C/T	C/T	C/G	T	C/T	T/C	A	C	C	G	T/G	C/T	A/C	A	2	2	1	1	1	0	2	2	0	2	2	0	0
501	G	C/T	C/T	C/G	C/T	C/T	T/C	A	C	C/T	G	T/G	C	A/C	G/A	1	1	1	2	1	1	1	1	2	2	0	0	0
502	G	C/T	C/T	C/G	C	C/T	T/C	A	C/G	T	G	T/G	C/T	A/C	G/A	0	1	2	2	2	0	2	0	0	0	1	2	0
503	G	C/T	T	C/G	T	T	T/C	A	C	C	G/C	T/G	C	A/C	G/A	2	1	1	2	2	1	2	2	2	0	0	1	0
504	G	C/T	C	C	T	C/T	T/C	A	C	C	G	T/G	C	A/C	G/A	0	0	2	1	1	1	1	0	1	0	1	1	0
505	G	C/T	C/T	C/G	T	T	T/C	A	C	C	G/C	T/G	C	A/C	G/A	2	1	1	2	1	1	1	1	1	1	0	1	1
506	G/A	C/T	C/T	C/G	C/T	T	T/C	A	C	C/T	G/C	T	C	A/C	G/A	2	0	0	1	1	0	2	0	0	0	2	2	1
507	G	C/T	C/T	C/G	C/T	C/T	T/C	A	C	C/T	G	T/G	C	A/C	G/A	2	1	1	0	2	0	2	0	1	2	1	0	0
508	G	C/T	C	C/G	C/T	C/T	T/C	A	C/G	C	G/C	T/G	C/T	A/C	A	0	1	1	2	0	0	1	0	0	1	1	1	0
509	G	C/T	C	C/G	T	C/T	T/C	A	C	C	G/C	T/G	C	A/C	G/A	1	1	1	0	0	2	2	0	1	1	1	1	0
510	G	C/T	C/T	C/G	C/T	C/T	T/C	A	C	C/T	G	T/G	C/T	A/C	G/A	0	0	2	1	2	1	1	1	2	1	1	1	1
511	G	C/T	C/T	C/G	C/T	C/T	T/C	G/A	C	C/T	G	T/G	C	A/C	G/A	0	0	1	2	2	1	2	1	1	1	1	1	1
512	G	C/T	C	C/G	C/T	C/T	T/C	A	C	C/T	G	T/G	C	A/C	G/A	0	2	1	1	0	0	1	1	2	0	1	2	0
513	G/A	T	C/T	C/G	T	C/T	T/C	A	C	C	G	T/G	C	A/C	G/A	0	2	1	1	1	2	2	1	0	0	1	0	0
514	G/A	T	T	G	C/T	C/T	T/C	A	C	C	G	T/G	C	A/C	G	1	0	1	1	1	1	1	1	1	1	0	0	1
515	G	T	C/T	C/G	C/T	C/T	T/C	A	C	C	G/C	T/G	C/T	A/C	G	2	2	2	2	0	2	2	1	1	1	1	1	0
516	G	C/T	C/T	G	C/T	C/T	T/C	A	C/G	C/T	G	T/G	C/T	A/C	G	0	1	1	1	2	1	2	0	2	2	1	1	0
517	G	C/T	C/T	C/G	C/T	C	T/C	A	C	C/T	G	T/G	C	A/C	G/A	1	1	1	2	2	2	1	1	1	2	1	0	0
518	G	T	C/T	C/G	C/T	C	T/C	A	C	C/T	C	G	C	A/C	G	0	1	1	2	0	1	2	1	1	2	1	0	0
519	G	C/T	C	G	C/T	C	T/C	A	C	C/T	G/C	T/G	C	A/C	G/A	2	1	1	2	2	1	2	2	0	0	1	0	0
520	G	C/T	C	C	T	C	T/C	A	C	C	G/C	T/G	C	A/C	G/A	2	2	1	2	1	1	2	2	1	0	1	1	0
521	G	C/T	C/T	C	T	C	T/C	A	C	C	G	T/G	C	A/C	G/A	2	1	0	2	0	1	2	1	1	0	1	0	0
522	G	C/T	C/T	C	T	C	T/C	A	C	C	G	T/G	C	A/C	G/A	0	2	0	2	1	1	2	1	1	1	0	1	0
523	G	T	T	C/G	T	C	T/C	A	C	C	G	T/G	C	A/C	G	2	0	0	1	1	2	2	1	0	0	2	1	0
524	G	C/T	C	C/G	C/T	C	T/C	A	C	C	G	T/G	C	A/C	G/A	0	0	2	1	1	1	2	1	2	1	1	1	1
525	G	C/T	C/T	C/G	C/T	C	T/C	A	C	C	G	T/G	C/T	A/C	G/A	1	2	2	1	1	1	1	1	0	0	2	2	0
526	G/A	T	C/T	C/G	T	C	T/C	A	C	C	G/C	T/G	C	A/C	G/A	2	2	2	1	0	2	1	1	0	0	1	0	0
527	G	T	C/T	C	T	C/T	T/C	A	C	C	G/C	T/G	C	C	A	0	1	1	2	1	1	2	2	2	0	1	2	0
528	G	C/T	C/T	C/G	C/T	C	T/C	A	C	C	G	T/G	C	A/C	G/A	1	1	2	2	0	0	2	0	0	0	0	0	0
529	G	C	C	C/G	C/T	C/T	T/C	G/A	C	C	G	T/G	C/T	A/C	G	0	0	1	1	2	1	2	1	1	0	2	1	0
530	G/A	C/T	C/T	G	C/T	T	T/C	G/A	C/G	C/T	G	T/G	C/T	C	A	1	1	0	2	1	1	2	2	2	0	1	2	0
531	G/A	C/T	C	C/G	T	C/T	T/C	G/A	G	C	G	T/G	C	C	A	1	1	1	2	0	0	2	2	2	0	2	0	0
532	G	C/T	C/T	C	C/T	C	T/C	A	C	C/T	G	G	C	A/C	A	1	0	1	2	1	1	2	1	2	1	1	1	0
533	G	C/T	C/T	C	C/T	C	T/C	A	C/G	C/T	G/C	G	C	A/C	G/A	1	1	1	2	0	2	2	1	1	0	2	2	0
534	G	C/T	C/T	C	T	C	T/C	G/A	C/G	C	G	G	C	A/C	G/A	0	2	2	2	2	1	2	1	1	1	1	0	0
535	G	C/T	C/T	C/G	C/T	C	T/C	G/A	C	C/T	G/C	G	C/T	A/C	G/A	0	0	1	1	2	0	2	2	2	0	2	0	2
536	G	C/T	C	C	C	T	T/C	A	C	C/T	G/C	T/G	C/T	A/C	G/A	0	1	1	1	0	1	1	1	1	0	2	0	0
537	G	C/T	C	C	C/T	C	T/C	A	C	C/T	G/C	T/G	C/T	A/C	G/A	0	1	1	2	2	1	2	0	1	1	1	2	0
538	G	C/T	C	C	C	C	T/C	A	C	T	G	T/G	C	A/C	G/A	0	0	0	2	2	0	1	0	2	2	1	2	0
539	G	C/T	C	C	C/T	C	T/C	A	C	C/T	G/C	T/G	C/T	A/C	G/A	0	1	1	2	2	1	2	0	2	2	2	0	0
540	G	C/T	C	C/G	T	C/T	T/C	A	C/G	C	G	T/G	C/T	A	G/A	2	2	1	2	0	1	2	1	0	0	1	1	0
541	G	C/T	C/T	C/G	T	C	T/C	A	C	C	G	T/G	C/T	A/C	A	2	0	0	2	1	1	2	1	0	0	2	0	1
542	G	C	C	C	C/T	C/T	C	A	C/G	C/T	G/C	G	C	C	A	0	2	2	1	1	0	2	2	2	0	2	1	0
543	G	C	C/T	C/G	C/T	T	T/C	A	C/G	C/T	G	G	C	C	G/A	2	0	0	1	2	1	0	2	2	0	1	0	2
544	G/A	T	C	C/G	C/T	C/T	T/C	G/A	C	C/T	G	T/G	C/T	C	G/A	0	0	1	2	0	1	2	1	1	0	1	1	0
545	G/A	C/T	C	C	C/T	C/T	C	A	C	T	G	T/G	C/T	A/C	G/A	0	1	1	1	0	0	1	1	1	2	2	1	0
546	G	C/T	C	C	C/T	C/T	T/C	A	C	C	G	G	C	A/C	G/A	1	2	0	1	1	1	0	2	0	0	2	0	1
547	G	T	C	C	C	C	T/C	A	C	C	G	G	C	A/C	G	2	2	1	1	0	1	2	2	1	0	2	1	0
548	G	C/T	C	C	C/T	C/T	T/C	A	C	C/T	G	T/G	C/T	A/C	G/A	1	1	2	2	0	2	2	2	1	2	2	1	1
549	G	C/T	C/T	C/G	C	C/T	T	A	C	C/T	G/C	G	C/T	A/C	A	2	1	1	2	0	2	2	2	0	0	2	1	0
550	G	C/T	C	C/G	C/T	C	T/C	A	C/G	C/T	G/C	G	C	C	G	0	1	2	1	1	1	2	0	1	1	1	1	2
551	G	C/T	C/T	G	C	C/T	T	A	C	C/T	C	T/G	C	A/C	G/A	2	1	1	2	2	1	2	0	1	0	1	2	0
552	G	T	C/T	C/G	C	C	T/C	A	C/G	C/T	C	T/G	C/T	C	A	1	1	0	2	2	1	2	2	1	2	1	1	1
553	G	T	C	C/G	C/T	C	T	A	C	C	G	T	C/T	A/C	A	1	2	1	1	1	0	1	1	2	0	1	2	0
554	G/A	T	C/T	G	T	C	T	A	C	C	C	G	C/T	C	G	2	1	0	2	1	1	2	2	1	1	0	1	0
555	G	C/T	C/T	G	C/T	C/T	T	A	C	C	G/C	G	C/T	A/C	G/A	2	2	1	2	0	0	1	1	2	1	1	2	0
556	G	C/T	C	G	C/T	C	T/C	A	C	C	G/C	G	C/T	C	G/A	0	2	1	1	1	0	2	2	2	2	2	2	0
557	G	C/T	C	C/G	T	C	T/C	A	C	C	G/C	G	C/T	C	G/A	1	1	1	1	0	1	2	2	2	0	1	1	0
558	G	C/T	T	C/G	T	C	T/C	A	C	C	C	G	C	C	G	0	0	1	1	0	1	2	1	1	2	1	0	0
559	G	C/T	C/T	C	T	C	C	A	C	C	G/C	T/G	C/T	A/C	G/A	1	2	1	2	2	0	1	0	1	2	1	0	1
560	G/A	T	C	C/G	C/T	C/T	T	A	C	C/T	C	T/G	C/T	A/C	G	0	0	1	2	1	1	2	1	0	1	1	1	0
561	G/A	C/T	C	C/G	C/T	C/T	T/C	A	C	C/T	G	T	C	A	G/A	1	2	1	1	0	2	2	2	1	0	2	2	0
562	A	C/T	C	C/G	C/T	C	C	G	C	C/T	G/C	G	C/T	A/C	G/A	2	1	1	0	2	1	2	2	1	0	1	2	0
563	A	C/T	C	C	C	C	C	G/A	C	C/T	G	G	C	A/C	A	2	1	0	0	2	2	2	2	2	2	2	2	0
564	G	C/T	T	C	C/T	C	C	A	C/G	C	G/C	G	C/T	C	G	1	0	1	2	1	1	2	1	1	0	2	0	0
565	G	T	C/T	C/G	T	C	T/C	A	C	C	G	T/G	C/T	A/C	G/A	2	2	1	2	2	0	2	2	1	0	1	0	0
566	G	T	C	C	T	C	C	A	C	C	C	T/G	C	A/C	G/A	1	2	2	1	2	0	2	2	2	0	2	0	0
567	G/A	T	C	C/G	C/T	C	T	G/A	C	C/T	G/C	G	C	C	G	0	1	2	1	0	2	2	2	2	1	2	1	0
568	G	C	C	C	C/T	C	T/C	A	C	C/T	G/C	T/G	C	C	G/A	0	2	1	2	0	2	2	1	1	1	2	2	0
569	G	C/T	C	C/G	C	C	T/C	A	C	T	G	G	C	C	G	2	0	2	2	2	1	2	1	0	2	1	1	0
570	G	C/T	C/T	C	C	C/T	C	A	C/G	C/T	G/C	T/G	C/T	A/C	G/A	2	2	1	1	2	0	2	2	2	2	1	0	0
571	G/A	T	T	G	T	C/T	T	G/A	C	C	G	T/G	C	A/C	G/A	0	1	1	2	0	1	2	2	2	1	2	1	0
572	G/A	T	C/T	G	C/T	C	T/C	G	C	C/T	G	T/G	C	A/C	G/A	2	1	1	1	1	0	2	1	2	2	2	1	0
573	G	C/T	T	C	T	C/T	C	A	C/G	C	G	T	C	C	G	1	0	1	1	1	2	2	2	2	1	0	0	0
574	G/A	C	C	C/G	T	C	T/C	G	C	C/T	G/C	G	C	C	G/A	0	1	2	2	1	1	2	0	1	0	0	0	0
575	G	C/T	C/T	C/G	T	C	T/C	G/A	C	C/T	G	T/G	C	C	G	2	2	1	1	2	1	1	1	1	1	1	0	0
576	G	C	C/T	G	C	C	T	A	C/G	T	G	G	C	C	G	1	2	1	1	1	1	2	0	0	0	1	0	0
577	G	C/T	C/T	G	C/T	C	T/C	A	C	C/T	G/C	G	C/T	A/C	G/A	2	1	1	2	0	0	2	1	0	1	1	1	0
578	G	C	C/T	C/G	C/T	C/T	T/C	A	C	C/T	G/C	G	C/T	C	A	2	1	0	2	2	1	0	1	0	0	1	0	1
579	G	C/T	C	C/G	C/T	C/T	T/C	A	C	C/T	G/C	G	T	C	A	2	1	1	1	2	1	2	1	1	0	1	0	0
580	G	T	C	C	C/T	C/T	C	A	C	C/T	G/C	G	C	C	A	1	2	1	1	2	1	2	2	1	0	2	2	0
581	G	C/T	C	C	C/T	C/T	T/C	A	C	C/T	G/C	T/G	C	A/C	A	1	0	1	2	0	1	2	1	1	2	2	0	0
582	G	C/T	C	G	T	T	T	A	C	C	G	T/G	C/T	C	G/A	1	2	1	2	1	1	2	1	2	2	0	2	0
583	G	T	C	C/G	T	T	T/C	A	C/G	C	G	G	C/T	C	G/A	0	2	2	2	0	0	2	2	1	1	0	1	0
584	G	T	C/T	C	T	T	T/C	A	C	C	G	T/G	C/T	A/C	G/A	0	1	1	2	0	1	2	1	1	1	1	0	0
585	G/A	C/T	C	C/G	T	C/T	T	A	C	C	G	T/G	C/T	A/C	G/A	2	1	0	1	2	1	2	2	0	0	2	1	0
586	G	C/T	C	C/G	C/T	C/T	C	A	C	C	G	T/G	C	A	G	1	1	1	2	0	0	1	1	1	1	1	2	0
587	G	T	C	C/G	T	C	T/C	A	C	C	G/C	T	C	A/C	G	2	1	1	2	1	0	1	2	1	0	2	1	0
588	G	C/T	T	C/G	T	C/T	T/C	A	C	C/T	G/C	T/G	C	A/C	G/A	1	1	1	0	0	0	1	1	2	1	2	2	0
589	G	C/T	C/T	C/G	C/T	C/T	T/C	A	C	C/T	G	T/G	C	A/C	G/A	2	1	1	2	1	2	2	0	2	1	2	2	0
590	G	C/T	C/T	C/G	C/T	C	T/C	A	C/G	C	G	T	C	A	A	0	1	1	2	1	1	1	2	0	1	2	0	0
591	G	T	C	C/G	C/T	C	T/C	A	C	C	G	T/G	C	A/C	G/A	0	2	1	2	1	0	1	1	2	0	1	1	0
592	G	T	C/T	G	C	C/T	T/C	A	C	C	G	T/G	C	A/C	G/A	0	2	1	1	2	1	2	2	2	0	2	2	0
593	G	C/T	C/T	C	C/T	C/T	T/C	A	C	C	G	T	C	A/C	G/A	0	2	1	2	0	0	2	0	1	0	1	1	0
594	G	C/T	C	C	C/T	C	T/C	A	C	C/T	G	T/G	C/T	A/C	G/A	0	1	1	2	0	1	2	1	2	1	1	2	0
595	G	C/T	C	C	C/T	C/T	T/C	A	C	C/T	G/C	T/G	C	A/C	G/A	0	0	2	2	1	0	2	0	0	0	1	1	0
596	G	C/T	C	C	C/T	C/T	T/C	A	C/G	C/T	G	T/G	C/T	A/C	G/A	0	2	1	2	1	0	1	0	2	1	1	2	0
597	G	C/T	C/T	C	C/T	C/T	T/C	G/A	C	C	G/C	T/G	C/T	A/C	G/A	1	2	0	2	0	1	1	1	1	2	1	0	0
598	G	C/T	C	C/G	C/T	C/T	T/C	A	C/G	C/T	G	T/G	C/T	A/C	G/A	0	1	2	2	1	0	2	1	1	0	1	2	0
599	G	C/T	C/T	C	C/T	C/T	T/C	A	C/G	C/T	G/C	T/G	C	A/C	G/A	1	2	1	2	0	0	2	1	0	1	1	1	0
600	G	C/T	C	C	C/T	C	T/C	A	C	C	G	T/G	C	A/C	G/A	1	2	1	2	2	1	1	0	1	2	0	0	0
601	G	C/T	C	C	C/T	C	T/C	A	C	C/T	G	T/G	C	A/C	G/A	0	1	2	2	0	2	2	0	1	0	2	2	0
602	G	C/T	C	C	C/T	C/T	T/C	A	C	C/T	G/C	T/G	C/T	A/C	G/A	0	2	1	1	2	0	2	2	2	0	1	1	0
603	G	C/T	C	C/G	C/T	C	T/C	A	C	C/T	G	T/G	C	A/C	G/A	0	1	1	2	2	0	1	2	2	1	1	0	0
604	G	C/T	T	C	C/T	C	T/C	A	C	C	G/C	T/G	C	A/C	G/A	0	1	2	2	1	0	2	1	0	0	2	0	0
605	G	C/T	C/T	C/G	C/T	C/T	T/C	A	C	C	G/C	T/G	C	A/C	G/A	1	2	0	2	0	0	2	1	2	1	1	0	0
606	G	C/T	T	C/G	C/T	C	T/C	A	C	C/T	G/C	T/G	C/T	A/C	G/A	2	1	1	2	1	1	2	2	2	0	0	1	0
607	G	C/T	C/T	C	C/T	C	T/C	A	C	C	G	T/G	C/T	A/C	G/A	0	2	2	1	2	0	2	0	0	0	0	1	0
608	G	C/T	C/T	C	C/T	C/T	T/C	A	C	C	G	T/G	C/T	A/C	G/A	0	2	1	2	1	0	2	1	1	0	1	1	0
609	G	C/T	C	C	C/T	C/T	T/C	A	C	C	G	T/G	C	A/C	G/A	0	1	0	1	0	2	1	0	1	2	1	1	0
610	G	C/T	T	C/G	C/T	C/T	T/C	A	C	C	G	T/G	C/T	A/C	G/A	0	2	2	2	1	0	2	0	0	1	1	0	1
611	G	C/T	C	C	C/T	C	T/C	A	C	C	G	T/G	C	A/C	G/A	1	1	1	2	1	1	1	2	2	1	2	0	0
612	G	C/T	C	C	C/T	C	T/C	A	C	C	G	T/G	C	A/C	G/A	1	0	2	1	1	0	1	1	1	0	0	1	0
613	G	C/T	C	C	C/T	C/T	T/C	A	C	C/T	G/C	T/G	C	A/C	G/A	0	2	1	1	0	1	2	1	2	0	1	2	0
614	G	C/T	C	C	C/T	C/T	T/C	A	C	C/T	G/C	T/G	C/T	A/C	G/A	0	1	2	2	1	0	2	0	0	1	1	2	0
615	G	C/T	C/T	C/G	C/T	C/T	T/C	A	C	C/T	G	T/G	C	A/C	G/A	0	2	2	2	1	0	2	1	1	2	1	1	0
616	G	C/T	T	C	C/T	C/T	T/C	A	C	C/T	G	T/G	C/T	A/C	G/A	0	2	1	1	0	1	2	1	1	2	1	1	0
617	G	C/T	C	C	C/T	C	T/C	A	C	C/T	G	T/G	C/T	A/C	G/A	1	1	1	2	1	0	1	1	1	0	2	2	0
618	G	C/T	C	C/G	C/T	C	T/C	A	C	C/T	G/C	T/G	C/T	A/C	G/A	2	1	1	2	2	1	1	2	1	0	2	1	0
619	G	C/T	C	C	C/T	C	T/C	A	C	C/T	G/C	T/G	C	A/C	G/A	0	1	1	2	2	1	2	2	1	0	2	1	0
620	G	C/T	T	C	C/T	C	T/C	A	C	C/T	G	T/G	C/T	A/C	G/A	0	0	1	2	1	0	2	0	1	2	2	2	0
621	G	C/T	T	C	C/T	C	T/C	A	C	C	G	T/G	C/T	A/C	G/A	0	0	1	1	2	1	2	0	0	2	1	0	0
622	G	C/T	C/T	C/G	C/T	C	T/C	A	C	C/T	G	T/G	C/T	A/C	A	1	1	1	2	2	0	2	1	0	1	1	1	0
623	G	C/T	C/T	C/G	C/T	C	T/C	A	C	C/T	G/C	T/G	C	A/C	G/A	0	2	1	2	2	0	1	1	1	0	1	1	0
624	G	C/T	C	C	C/T	C/T	T/C	A	C	C/T	G/C	T/G	C/T	A/C	G/A	0	1	2	1	1	0	2	1	1	2	0	1	0
625	G	C/T	C	C	C/T	C/T	T/C	A	C	C	G/C	T/G	C/T	A/C	A	0	2	2	2	1	0	2	0	1	2	1	0	0
626	G	C/T	C/T	C	C/T	C/T	T/C	A	C	C	G/C	T/G	C/T	A/C	G/A	0	0	1	2	1	1	1	0	1	1	1	1	0
627	G	C/T	C/T	C/G	C/T	C	T/C	G/A	C	C/T	G/C	T/G	C/T	A/C	G/A	0	1	2	2	0	0	1	0	1	2	0	1	0
628	G	C/T	C	C	C/T	C	T/C	A	C	C	G	T/G	C/T	A/C	G/A	1	0	1	2	2	0	2	1	2	1	1	1	0
629	G	C/T	C	C	C/T	C/T	T/C	A	C	C	G/C	T/G	C	A/C	G/A	0	1	2	2	0	0	2	0	0	2	0	0	0
630	G	C/T	C	C	C/T	C	T/C	A	C	C/T	G/C	T/G	C	A/C	G/A	0	2	1	2	0	1	2	1	2	0	2	2	0
631	G	C/T	C/T	C/G	C/T	C/T	T/C	A	C	C/T	G	T/G	C	A/C	G/A	0	2	1	1	0	1	2	0	0	1	1	2	0
632	G	C/T	C	C	C/T	C/T	T/C	A	C	C/T	G	T/G	C	A/C	G/A	1	1	1	1	0	2	1	1	0	0	1	0	0
633	G	C/T	C	C	C/T	C/T	T/C	A	C	C/T	G	T/G	C	A/C	G/A	0	2	1	1	2	1	2	2	2	2	1	0	0
634	G	C/T	C	C	C/T	C/T	T/C	A	C	C/T	G	T/G	C/T	A/C	G/A	0	2	1	2	2	1	2	1	1	2	1	2	0
635	G	C/T	C	C/G	C/T	C	T/C	A	C	C/T	G	T/G	C	A/C	G/A	0	2	1	2	2	0	2	0	2	2	1	1	0
636	G	C/T	C	C	C/T	C/T	T/C	A	C	C	G/C	T/G	C/T	A/C	G/A	0	2	1	2	2	1	2	1	1	2	1	1	0
637	G	C/T	C/T	C/G	C/T	C	T/C	A	C	C	G/C	T/G	C/T	A/C	G/A	1	2	1	1	1	0	2	2	1	1	1	0	0
638	G	C/T	C/T	C/G	C/T	C	T/C	A	C	C/T	G	T/G	C	A/C	G/A	2	2	1	1	0	1	1	2	1	0	1	0	0
639	G	C/T	C	C	C/T	C	T/C	A	C	C/T	G/C	T/G	C/T	A/C	G/A	1	2	1	0	2	0	2	1	1	1	1	1	0
640	G	C/T	T	C	C/T	C	T/C	A	C	C/T	G	T/G	C/T	A/C	G/A	1	0	1	2	2	0	1	1	2	2	1	1	0
641	G	C/T	T	C	C/T	C	T/C	A	C	C/T	G	T/G	C	A/C	G/A	0	0	1	2	2	0	2	2	1	2	2	0	0
642	G	C/T	C	C	C/T	C	T/C	A	C	C/T	G	T/G	C/T	A/C	G/A	0	2	1	2	1	0	1	1	2	1	1	1	0
643	G	C/T	C	C	C/T	C	T/C	A	C	C	G/C	T/G	C	A/C	A	1	2	1	2	2	0	2	0	1	2	0	0	0
644	G	C/T	C	C/G	C/T	C	T/C	A	C	C	G/C	T/G	C	A/C	G/A	0	2	1	2	1	0	2	1	2	1	1	2	0
645	G	C/T	C	C	C/T	C	T/C	A	C	C	G	G	T	A/C	G/A	2	1	1	2	1	1	2	2	1	0	1	2	1
646	G	C/T	C	C	C/T	C	T/C	A	C	C/T	G	T/G	C	A/C	G/A	0	1	1	1	1	0	2	1	1	2	1	0	0
647	G	C/T	C	C/G	C/T	C	T/C	G/A	C	C/T	G	T/G	C/T	A/C	G/A	0	1	1	2	2	0	2	1	2	2	2	1	0
648	G	C/T	C/T	C/G	C/T	C	T/C	A	C	C	G/C	T/G	C/T	A/C	G/A	0	1	1	2	1	1	2	1	1	0	1	0	0
649	G	C/T	C	C/G	C/T	C/T	T/C	A	C	C/T	G	T/G	C	A/C	A	0	1	1	1	2	1	2	1	2	2	1	0	0
650	G	C/T	C	C	C/T	C	T/C	A	C	C/T	G	T/G	C	A/C	G/A	0	0	2	2	1	0	2	2	2	0	1	0	0
651	G	C/T	C/T	C/G	C/T	C/T	T/C	A	C	C	G/C	T/G	C/T	A/C	G/A	0	2	1	2	1	0	2	1	2	1	1	1	0
652	G	C/T	C/T	C/G	C/T	C	T/C	A	C	C	G	T/G	C/T	A/C	G/A	2	1	1	1	2	0	2	2	1	0	1	0	0
653	G	C/T	C/T	C/G	C/T	C	T/C	A	C	C/T	G/C	T/G	C	A/C	G/A	2	1	1	2	2	1	2	2	0	2	1	1	0
654	G	C/T	C	C	C/T	C	T/C	A	C	C	G/C	T/G	C/T	A/C	G/A	2	2	2	2	2	0	2	2	1	2	1	1	0
655	G	C/T	C	C	C/T	C	T/C	A	C	C/T	G/C	T/G	C/T	A/C	G/A	0	1	1	2	0	1	1	1	1	1	1	0	1
656	G	C/T	C	C/G	C/T	C/T	T/C	G/A	C	C	G	T/G	C/T	A/C	G/A	1	0	2	2	2	0	2	2	2	2	1	1	0
657	G	C/T	T	C	C/T	C	T/C	A	C	C/T	G/C	T/G	C	A/C	G/A	0	0	2	2	0	1	2	1	0	0	1	1	0
658	G	C/T	C/T	C	C/T	C/T	T/C	A	C	C/T	G/C	T/G	C	A/C	G/A	0	2	1	2	2	1	1	0	1	2	1	0	0
659	G	C/T	C/T	C	C/T	C	T/C	A	C	C/T	G/C	T/G	C	A/C	G/A	0	0	2	2	0	1	2	2	2	2	1	1	0
660	G	C/T	T	C	C/T	C	T/C	A	C	C	G	T	C/T	A/C	G/A	0	2	1	2	1	0	2	0	2	2	1	2	0
661	G	C/T	T	C/G	C/T	C	T/C	A	C	C/T	C	T/G	C/T	A	G/A	0	2	2	2	1	0	2	0	2	2	1	2	0
662	G	C/T	C	C	C/T	C	T/C	G/A	C	C/T	G	T/G	C/T	A/C	G/A	1	2	2	2	1	0	1	1	1	2	0	2	0
663	G	C/T	C/T	C/G	C/T	C	T/C	G/A	C	C	G	T/G	C	A/C	G/A	0	1	1	1	2	0	2	2	2	1	1	2	0
664	G	C/T	C	C	C/T	C	T/C	A	C	C	G	T/G	C/T	A/C	G/A	0	1	1	2	1	0	1	0	1	1	1	2	0
665	G	C/T	C	C	C/T	C	T/C	A	C	C/T	G/C	T/G	C	A/C	G/A	0	2	1	2	1	0	2	1	2	0	1	1	0
666	G	C/T	C/T	C	C/T	C	T/C	A	C	C	G	T/G	C/T	A/C	G/A	0	1	2	2	2	0	2	0	1	1	1	1	0
667	G	C/T	C/T	C	C/T	C/T	T/C	G/A	C	C	G	T/G	C	A/C	G/A	0	2	1	2	2	1	1	2	2	2	1	1	0
668	G	C/T	C/T	C	C/T	C	T/C	A	C	C/T	G	T/G	C/T	A/C	G/A	1	1	1	2	2	1	1	1	2	0	1	0	0
669	G	C/T	C	C/G	C/T	C	T/C	A	C	C	G/C	T/G	C/T	A/C	G/A	0	1	1	2	2	1	2	1	1	2	1	1	0
670	G	C/T	C	C/G	C/T	C	T/C	A	C	C/T	G/C	T/G	C	A/C	A	1	0	1	2	2	1	2	2	2	0	1	2	0
671	G	C/T	C/T	C	C/T	C/T	T/C	A	C	C	G/C	T/G	C	A/C	G/A	0	2	2	1	0	1	2	0	1	2	0	0	0
672	G	C/T	C	C	C/T	C/T	T/C	A	C	C	G	T/G	C	A/C	G/A	0	2	1	1	0	0	1	0	1	2	1	0	0
673	G	C/T	C/T	C/G	C/T	C	T/C	A	C	C/T	G	T/G	C/T	A/C	G/A	0	1	1	2	2	1	1	1	1	1	1	1	0
674	G	C/T	C/T	C	C/T	C	T/C	A	C	C/T	G	T/G	C/T	A/C	G/A	0	1	1	1	2	1	1	1	1	2	1	2	0
675	G	C/T	C/T	C/G	C/T	C	T/C	A	C	C/T	G/C	T/G	C	A/C	G/A	1	0	1	2	0	1	2	2	1	0	1	0	0
